1 ***The comprehensive genetic architecture of brain white matter***

2

3 **Running title: GWAS of brain white matter**

4

5 Bingxin Zhao<sup>1</sup>, Tengfei Li<sup>2,3</sup>, Yue Yang<sup>1</sup>, Xifeng Wang<sup>1</sup>, Tianyou Luo<sup>1</sup>, Yue Shan<sup>1</sup>, Ziliang  
6 Zhu<sup>1</sup>, Di Xiong<sup>1</sup>, Yun Li<sup>1,4,5</sup>, Jason L. Stein<sup>4,6</sup>, and Hongtu Zhu<sup>1,3\*</sup>

7

8 <sup>1</sup>Department of Biostatistics, University of North Carolina at Chapel Hill, Chapel Hill, NC,  
9 USA

10 <sup>2</sup>Department of Radiology, University of North Carolina at Chapel Hill, Chapel Hill, NC,  
11 USA

12 <sup>3</sup>Biomedical Research Imaging Center, School of Medicine, University of North Carolina  
13 at Chapel Hill, Chapel Hill, NC, USA

14 <sup>4</sup>Department of Genetics, University of North Carolina at Chapel Hill, Chapel Hill, NC,  
15 USA

16 <sup>5</sup>Department of Computer Science, University of North Carolina at Chapel Hill, Chapel  
17 Hill, NC, USA

18 <sup>6</sup>UNC Neuroscience Center, University of North Carolina at Chapel Hill, Chapel Hill, NC,  
19 USA

20

21

22 *\*Corresponding author:*

23

24 Hongtu Zhu

25 3105C McGavran-Greenberg Hall, 135 Dauer Drive, Chapel Hill, NC 27599.

26 E-mail address: [htzhu@email.unc.edu](mailto:htzhu@email.unc.edu) Phone: (919) 966-7250

27

28 List of Pediatric Imaging, Neurocognition and Genetics (PING) authors provided in the  
29 supplemental materials.

30

31

## 1 Abstract

2 White matter keeps human brain globally connected and shapes communication and  
3 connectivity patterns among brain regions. White matter microstructure influences  
4 brain structural integrity and may underpin brain functions and disorders. Although  
5 under strong genetic control, a large number of genetic variants of white matter remain  
6 undiscovered. Here we analyzed the genetic architecture of white matter using diffusion  
7 magnetic resonance image (dMRI) of 42,279 individuals (35,101 in the UK Biobank). The  
8 dMRIs were consistently processed to generate 215 neuroimaging traits, including 105  
9 measures from tract-specific functional principal component analysis. Genome-wide  
10 association analysis identified hundreds of novel independent risk variants ( $P < 2.3 \times$   
11  $10^{-10}$ ) for white matter microstructural differences. We uncovered 760 pairs of  
12 significant genetic correlation between white matter tracts and 60 other complex traits  
13 ( $P < 2.3 \times 10^{-3}$ ), including stroke, brain-related disorders (e.g., ADHD, bipolar disorder,  
14 major depressive disorder), cognition, neuroticism, chronotype, as well as non-brain  
15 traits, such as hypertension, type 2 diabetes, lung function, coronary artery disease, and  
16 bone mineral density. Hi-C coupled gene-based analysis identified a large number of  
17 pleiotropic genes associated with both white matter and the above complex traits.  
18 Gene-set analysis indicated pathways involved in brain disease pathogenesis,  
19 developments and abnormalities of neural cells, and repair of white matter damage ( $P <$   
20  $1.5 \times 10^{-8}$ ). In summary, this large-scale tract-specific study provides a big step forward  
21 in understanding the genetics of white matter and its genetic links to other complex  
22 traits.

23

24 **Keywords:** Brain White Matter; dMRI; Diffusion Tensor Imaging; GWAS; FPCA; UK  
25 Biobank.

26

27

28

29

30

31

1 Brain functions depend on effective communication among brain regions<sup>1</sup>. White matter  
2 comprises roughly half of the human brain and contains most of the brain's long-range  
3 communication pathways<sup>2</sup>. White matter tracts build a complex network of structural  
4 connections, which keeps the brain globally connected and shapes communication and  
5 connectivity patterns<sup>3-5</sup>. Cellular microstructure in white matter tracts influences the  
6 integrity of connectivity and mediates signal transitions among distributed brain  
7 regions<sup>6</sup>. Evidence from neuroscience has suggested that white matter microstructure  
8 may underpin brain functions and dysfunctions<sup>1,7,8</sup>, and connectivity differences or  
9 changes are relevant to a wide variety of neurological and psychiatric disorders, such as  
10 attention-deficit/hyperactivity disorder (ADHD)<sup>9</sup>, major depressive disorder (MDD)<sup>10</sup>,  
11 schizophrenia<sup>11</sup>, bipolar disorder<sup>12</sup>, multiple sclerosis<sup>13</sup>, Alzheimer's disease<sup>14</sup>,  
12 corticobasal degeneration<sup>15</sup>, and Parkinson's disease<sup>16</sup>. White matter microstructural  
13 differences and abnormalities can be captured *in vivo* by diffusion magnetic resonance  
14 imaging (dMRI). Using dMRI data, microstructural connectivity can be quantified in  
15 diffusion tensor imaging (DTI) models<sup>17</sup> and measured by several DTI-derived  
16 parameters, including fractional anisotropy (FA), mean diffusivity (MD), axial diffusivity  
17 (AD), radial diffusivity (RD), and mode of anisotropy (MO). Among them, FA serves as  
18 the primary metric of interest in many studies<sup>18</sup>, which is a robust global measure of  
19 integrity/directionality and is highly sensitive to general connectivity changes. On the  
20 other hand, MD, AD, and RD directly quantify the abstract magnitude of directionalities,  
21 and thus are more sensitive to specific types of microstructural changes<sup>19</sup>. In addition,  
22 MO can describe whether the region of anisotropy is linear anisotropic, orthotropic, or  
23 planar anisotropic<sup>20</sup>. See **Supplementary Note** for a global overview of these commonly  
24 used DTI parameters.

25

26 White matter differences in general population cohorts are under strong genetic  
27 control. Both family and population-based studies have reported that DTI parameters  
28 can have high heritability with estimates varying across different age groups<sup>21</sup> and  
29 tracts<sup>22</sup>. For example, FA in adolescents twins can have heritability larger than 70%<sup>23</sup>.  
30 Recent genome-wide association studies (GWAS) of UK Biobank reported an average of  
31 48.7% heritability across different tracts, with 68% in cingulum cingulate gyrus (CGC)  
32 and 27% in corticospinal tract (CST)<sup>24</sup>. Several GWAS<sup>22,24-28</sup> have been performed to

1 identify risk variants for white matter but shared at least two major limitations. The first  
2 one is small sample size. For most of dMRI measures, the largest GWAS sample size is  
3 17,706 in Zhao, et al.<sup>24</sup>. Similar to other brain-related traits<sup>29</sup>, white matter has a  
4 complex and extremely polygenic genetic architecture<sup>24,30</sup>. Large sample size is essential  
5 to boost the GWAS power to identify many common risk variants with small or medium  
6 effect size. The second one is that previous GWAS mainly focused on global dMRI  
7 measures of the whole brain<sup>25,26</sup> or tract-averaged mean values<sup>22,24</sup>. Global and  
8 tract-averaged mean measures can capture the largest variations in white matter, while  
9 reducing the burden to test multiple neuroimaging traits, particularly suitable for GWAS  
10 with limited sample size; however, these measures largely ignore the complicated  
11 geometric characteristics of voxel-wise maps in 3D tracts. These limitations result in that  
12 a large number of genetic factors of white matter may still be undiscovered.  
13 Consequently, with few exceptions (e.g., stroke<sup>25</sup> and cognitive traits<sup>24</sup>), the shared  
14 genetic influences between white matter and other complex traits remain unclear.

15

16 To overcome these limitations, here we collected individual-level dMRIs from five data  
17 resources: the UK Biobank<sup>31</sup>, Adolescent Brain Cognitive Development (ABCD<sup>32</sup>), Human  
18 Connectome Project (HCP<sup>33</sup>), Pediatric Imaging, Neurocognition, and Genetics (PING<sup>34</sup>),  
19 and Philadelphia Neurodevelopmental Cohort (PNC<sup>35</sup>). We consistently processed these  
20 images by using the ENIGMA-DTI pipeline<sup>36,37</sup> and obtained voxel-wise DTI maps for  
21 42,279 subjects (after quality controls), including 35,101 in UK Biobank. We mainly  
22 focused on 21 predefined white matter tracts and generated two groups of phenotypes.  
23 The first group contains 110 tract-averaged mean parameters for FA, AD, MD, MO and  
24 RD in 21 tracts and the whole brain. Second, we applied functional principal component  
25 analysis (FPCA) to generate 105 tract-specific principal components (PCs) by taking the  
26 top five PCs of the voxel-wise FA map within each tract. These 105 tract-specific FA PC  
27 parameters are expected to provide additional microstructural details omitted by  
28 tract-averaged mean values<sup>38,39</sup>, while keeping the multiple testing burden not too  
29 heavy. We then performed a comprehensive genome-wide analysis for these 215  
30 phenotypes to discover the genetic architecture of white matter and explore the genetic  
31 links to other complex traits in different trait domains. Our GWAS results have been

1 made publicly available at <https://github.com/BIG-S2/GWAS> and can be easily browsed  
2 through our Brain Imaging Genetics Knowledge Portal <https://bigkp.web.unc.edu/>.

3

## 4 RESULTS

### 5 GWAS Discovery and Validation for 215 DTI parameters.

6 We mainly used the UKB subjects of British ancestry for GWAS discovery ( $n = 33,292$ ). All  
7 of the 110 DTI mean parameters had significant SNP heritability<sup>40</sup> ( $h^2$ ) after Bonferroni  
8 adjustment (215 tests,  $P < 9.4 \times 10^{-31}$ , **Fig. 1** and **Supplementary Table 1**). The  $h^2$   
9 estimates varied from 24.8% to 65.4% (mean  $h^2 = 46.3\%$ ), which were comparable with  
10 previous results<sup>22,24</sup>. For the 105 tract-specific FA PC parameters, we found that 102 had  
11 significant  $h^2$  (mean  $h^2 = 34.1\%$ ,  $h^2$  range = (8.6%, 65.8%),  $P < 1.1 \times 10^{-5}$ ). The 4<sup>th</sup> PC of  
12 corticospinal tract (CST, 6.2%), 5<sup>th</sup> PC of cingulum hippocampus (CGH, 4.4%), and 4<sup>th</sup> PC  
13 of superior fronto-occipital fasciculus (SFO, 3.7%) had nominally significant  $h^2$  estimates  
14 ( $P < 0.03$ ), which became insignificant after Bonferroni adjustment. The top five PCs in  
15 external capsule (EC) were highlighted in bottom panels of **Figure 1**. Different from  
16 tract-averaged mean, these PCs captured more specific variations in distinct subfields of  
17 EC, all of which had high  $h^2$  (mean  $h^2 = 47.9\%$ ,  $h^2$  range = (42.9%, 52.6%),  $P < 1.8 \times 10^{-89}$ ).  
18 Another illustration was given in **Supplementary Figure 1** for the PCs of superior  
19 longitudinal fasciculus (SLF). These  $h^2$  results show that the additional microstructural  
20 variations captured by unconventional tract-specific PC parameters are also generally  
21 under genetic control.

22

23 We performed linear mixed model-based association analysis for 9,023,710 common  
24 genetic variants via fastGWA<sup>41</sup> (Methods). At the stringent significance level  $2.3 \times 10^{-10}$   
25 (i.e.,  $5 \times 10^{-8}/215$ , additionally adjusted for the 215 phenotypes studied), we identified  
26 595 independent (LD  $r^2 < 0.6$ , Methods) significant variants that had 1,101 significant  
27 associations with 86 FA measures (21 mean and 65 PC parameters, **Supplementary Figs.**  
28 **2-3** and **Supplementary Table 2**). Of the 595 independent significant variants, 302 can  
29 only be detected by PC parameters. On average, the number of FA-associated  
30 independent significant variants was 37.0 in each tract (range = (4, 72), **Fig. 2** and  
31 **Supplementary Table 3**), 50.3% of which were solely discovered by PC parameters  
32 (range = (26.3%, 100%)). For example, all of the 22 independent significant variants

1 associated with CST were detected by PC parameters. Moreover, 66.7% (32/48) of the  
2 variants in posterior corona radiata (PCR), 64.9% (37/57) in posterior thalamic radiation  
3 (PTR), 59.7% (43/72) in SLF, and 56.3% (18/32) in CGC were only associated with PC  
4 parameters. These results clearly illustrate the unique contribution of tract-specific PC  
5 parameters in identifying genetic risk variants for white matter.

6

7 In addition, 770 independent significant variants were associated with 83 mean  
8 parameters of AD, MD, MO and RD (2,069 significant associations), 565 of these 770  
9 variants (with 967 associations) were not identified by FA measures (**Fig. 2,**  
10 **Supplementary Figs. 2-3,** and **Supplementary Table 2**). The mean number of  
11 independent significant variants in each tract moved up to 93.3 (range = (41, 160)). Of  
12 note, more than 70% of independent significant variants in CGH (90.7%), SFO (78.0%),  
13 and CGC (73.3%) were detected by non-FA measures (**Supplementary Table 4**). On the  
14 other hand, all autosomal chromosomes had risk variants except for chromosome 21  
15 (**Supplementary Table 5**). Interestingly, though only 9.1% of the genome was occupied  
16 by chromosomes 5 and 17 (6.5% and 2.6%, respectively), the two chromosomes  
17 contributed 47.8% associations of independent significant variants (36.2% and 11.6%,  
18 respectively). Previously identified genetic signals of DTI parameters were enriched on  
19 chromosomes 5. For example, Rutten-Jacobs, et al. <sup>25</sup> found strong associations for  
20 global FA and MD measures in chr5q14 locus, and 502 of the 696 (72.1%) associations  
21 identified in Zhao, et al. <sup>24</sup> located on chromosome 5. Our results confirm the  
22 enrichment of signals on chromosome 5 and also uncover widespread novel variants  
23 across the genome.

24

25 Based on LD structures in the 1000 Genomes reference panel<sup>42</sup>, independent lead SNPs  
26 and genetic loci were defined by FUMA<sup>43</sup> (Methods), and the 3,170 (1,101 + 2,609)  
27 significant variant-trait associations can be characterized as 994 significant locus-trait  
28 associations (**Supplementary Tables 6-7**). We then performed functionally informed fine  
29 mapping for these locus-level signals using SuSiE<sup>44</sup> via PolyFun<sup>45</sup> framework (Methods).  
30 PolyFun + SuSiE identified 6,882 variant-trait pairs that had posterior causal probability  
31 (i.e., PIP) > 0.95 for 2,299 variants (**Supplementary Table 8**). Frequently fine-mapped  
32 variants for these DTI parameters included rs309587, rs2445874, rs3852188, rs3931702,

1 and rs7733216 in *VCAN*; rs10451283 and rs9897399 in *LINC02210-CRHR1*; rs2770573  
2 and rs9393777 in *LINC00240*; rs242561 and rs62062794 in *MAPT*; and rs199510,  
3 rs70600, and rs70602 in *WNT3*, may suggest the existence of multiple causal effects in  
4 associated loci. In summary, our results illuminate the broad genetics control on white  
5 matter microstructural differences. The genetic effects are spread across a large number  
6 of variants, consistent with the observed extremely polygenic genetic architecture of  
7 many brain-related traits<sup>29,46</sup>.

8

9 We aimed to find out-of-sample supports for our discovery GWAS in five independent  
10 validation GWAS of European ancestry: the UKB White but Non-British (UKBW,  $n =$   
11 1,809), ABCD European (ABCDE,  $n = 3,821$ ), HCP ( $n = 334$ ), PING ( $n = 461$ ), and PNC ( $n =$   
12 537). First, for each DTI parameter, we checked the genetic correlation (gc) between  
13 discovery GWAS and the meta-analyzed European validation GWAS (total  $n = 6,962$ ) by  
14 LDSC<sup>47</sup> (Methods). The mean gc estimates was 0.95 (standard error = 0.35) across the  
15 215 DTI parameters, 121 of which were significant after adjusting for multiple testing by  
16 the Benjamini-Hochberg (B-H) procedure at 0.05 level ( $P < 0.03$ , **Supplementary Table**  
17 **9**). Genetic correlation estimates  $\approx 1$  indicates consistent genetic basis of the same  
18 phenotype sampled in different GWAS. Next, we meta-analyzed our discovery GWAS  
19 with these European validation GWAS and found that 79.6% significant associations had  
20 smaller  $P$ -values after meta-analysis, suggesting similar effect size of the top variants in  
21 independent cohorts<sup>48,49</sup>. Additionally, we tested for replication by using polygenic risk  
22 scores<sup>50</sup> (PRS) derived from discovery GWAS (Methods). After B-H adjustment at 0.05  
23 level ( $215 \times 5$  tests), the mean number of significant PRS in the five validation GWAS  
24 datasets was 195 (range = (193, 211),  $P$  range = ( $8.5 \times 10^{-27}$ ,  $4.5 \times 10^{-2}$ ), **Supplementary**  
25 **Figs. 4-5** and **Supplementary Table 10**). Almost all (214/215) DTI parameters had  
26 significant PRS in at least one dataset and 165 had significant PRS in all of them, showing  
27 the high generalizability of our discovery GWAS results. Across the five validation  
28 datasets, the mean additional variance that can be explained by PRS (i.e., incremental  
29 R-squared) was 1.7% (range = (0.4%, 4.2%)) for the 165 consistently significant DTI  
30 parameters. The largest mean (incremental) R-squared was on the 2<sup>nd</sup> PC of EC (range =  
31 (2.2%, 6.5%),  $P$  range = ( $7.2 \times 10^{-24}$ ,  $1.5 \times 10^{-9}$ )).

32



1 Finally, we constructed PRS on two non-European validation GWAS datasets: the ABCD  
2 Hispanic (ABCDH,  $n = 768$ ) and ABCD African American (ABCDA,  $n = 1,257$ ). The number  
3 of significant PRS became 121 and 114 in ABCDH and ABCDA, respectively (B-H  
4 adjustment at 0.05 level, **Supplementary Table 11**), which were much smaller than the  
5 ones observed in the above European validation GWAS. ABCDH and ABCDE had similar  
6 prediction accuracy (mean 0.74% vs. 0.69%,  $P = 0.28$ ), but the prediction performance  
7 was significantly reduced in ABCDA (mean 0.48% vs. 0.69%,  $P = 1.9 \times 10^{-7}$ ). These  
8 findings show that UKB British GWAS findings have high generalizability in European  
9 cohorts, but the generalizability can be reduced in cross-population applications,  
10 highlighting the importance of recruiting sufficient samples from global diverse  
11 populations in future genetics discovery of white matter.

12

### 13 **Concordance with previous GWAS.**

14 Of the 33,292 subjects in our UKB British discovery GWAS, 17,706 had been used in the  
15 largest previous GWAS<sup>24</sup> for 110 mean parameters. To examine the robustness of their  
16 findings, we used the other 15,214 individuals (also removed the relatives<sup>51</sup> of previous  
17 GWAS subjects) to perform a new validation GWAS and then evaluated the strength of  
18 replication (Methods). We calculated the replication slope, which was the correlation of  
19 the standardized effect size of variants estimated from two independent GWAS<sup>52</sup>. This  
20 analysis was restricted to top ( $P < 1 \times 10^{-6}$  in previous GWAS) independent lead variants  
21 after LD-based clumping (window size 250, LD  $r^2 = 0.01$ ). The replication slope was 0.84  
22 (standard error = 0.02,  $P < 2 \times 10^{-16}$ ), indicating strong similarity between these top  
23 variant effect size estimates. We also applied FINDOR<sup>52</sup> to reweight  $P$ -values by  
24 leveraging functional enrichments, after which the replication slope increased to 0.86  
25 (standard error = 0.02,  $P < 2 \times 10^{-16}$ ). In addition, for each of the 110 mean parameters,  
26 we checked the LDSC genetic correlation of the values sampled in the two GWAS. The  
27 mean gc estimates was 1.03 (standard error = 0.14, **Supplementary Fig. 6** and  
28 **Supplementary Table 12**) across these parameters, all of which were significant after  
29 B-H adjustment at 0.05 level ( $P < 1.4 \times 10^{-5}$ ). In conclusion, these findings indicate that  
30 previous UKB GWAS results can be strongly validated in the new UKB British cohort.

31



1 Next, we carried out association lookups for 1,160 (595 + 565) independent significant  
2 variants (and variants within LD) detected in our UKB British discovery GWAS (Methods).  
3 Of the 213 variants (with 696 associations) identified in Zhao, et al. <sup>24</sup>, 202 (with 671  
4 associations) were in LD ( $r^2 \geq 0.6$ ) with our independent significant variants  
5 (**Supplementary Table 13**). On the NHGRI-EBI GWAS catalog<sup>53</sup>, our results tagged many  
6 variants that had been implicated with brain structures, including 7 in van der Meer, et  
7 al. <sup>54</sup> for hippocampal subfield volumes, 7 in Verhaaren, et al. <sup>55</sup> for cerebral white  
8 matter hyperintensity (WMH) burden, 5 in Vojinovic, et al. <sup>56</sup> for lateral ventricular  
9 volume, 5 in Rutten-Jacobs, et al. <sup>25</sup> for WMH and white matter integrity, 2 in Klein, et al.  
10 <sup>57</sup> for intracranial volume, 2 in Hibar, et al. <sup>58</sup> for subcortical brain region volumes, 2 in  
11 Fornage, et al. <sup>27</sup> for WMH burden, 1 in Elliott, et al. <sup>22</sup> for brain imaging measurements,  
12 1 in Luo, et al. <sup>59</sup> for voxel-wise brain imaging measurement, 1 in Hashimoto, et al. <sup>60</sup> for  
13 superior frontal gyrus grey matter volume, 1 in Ikram, et al. <sup>61</sup> for intracranial volume,  
14 and 1 in Sprooten, et al. <sup>62</sup> for global FA (**Supplementary Table 14**). When the  
15 significance threshold was relaxed to  $5 \times 10^{-8}$ , we tagged variants reported in more  
16 previous studies, such as 2 in Shen, et al. <sup>63</sup> for brain imaging measurements, 2 in Chung,  
17 et al. <sup>64</sup> for hippocampal volume in dementia, 1 in Chen, et al. <sup>65</sup> for putamen volume,  
18 and 1 in Christopher, et al. <sup>66</sup> for posterior cingulate cortex (**Supplementary Table 15**).

19  
20 Moreover, we found lots of previous associations with other complex traits in different  
21 domains (**Supplementary Table 16**). We highlighted 190 variants with psychological  
22 traits (e.g., neuroticism<sup>67</sup>, well-being spectrum<sup>68</sup>, general risk tolerance<sup>69</sup>), 179 with  
23 cognitive/educational traits (e.g., cognitive ability<sup>70</sup>, educational attainment<sup>71</sup>), 99 with  
24 psychiatric disorders (e.g., schizophrenia<sup>72</sup>, MDD<sup>73</sup>, bipolar disorder<sup>74</sup>, ADHD<sup>75</sup>, autism  
25 spectrum disorder<sup>76</sup>), 95 with anthropometric traits (e.g., height<sup>77</sup>, body mass index  
26 (BMI)<sup>52</sup>), 68 with bone mineral density<sup>78,79</sup>, 54 with smoking/drinking (e.g., smoking<sup>80</sup>,  
27 alcohol use disorder<sup>81</sup>), 20 with neurological disorders (e.g., corticobasal degeneration<sup>82</sup>,  
28 Parkinson's disease<sup>83</sup>, Alzheimer's disease<sup>84</sup>, multiple sclerosis<sup>85</sup>), 18 with sleep (e.g.,  
29 sleep duration<sup>86</sup>, chronotype<sup>87</sup>), 11 with glioma (glioblastoma or non-glioblastoma)  
30 tumors<sup>88,89</sup>, and 6 with stroke<sup>90-92</sup>.

31

1 To further explore these overlaps, we summarized the number of previously reported  
2 variants of other traits that can be tagged by any DTI parameters in each white matter  
3 tract (**Supplementary Table 17**). We found that variants associated with psychological,  
4 cognitive/educational, smoking/drinking traits and neurological and psychiatric  
5 disorders were globally linked to many white matter tracts (**Fig. 3**). For traits in other  
6 domains, the overlaps may have some tract-specific patterns. For example, 3 of the 6  
7 variants associated with stroke were linked to both SFO and anterior limb of internal  
8 capsule (ALIC), and another 3 were found in superior corona radiata (SCR), anterior  
9 corona radiata (ACR), genu of corpus callosum (GCC), body of corpus callosum (BCC), EC,  
10 posterior limb of internal capsule (PLIC), and posterior limb of internal capsule (RLIC). In  
11 addition, 7 of the 11 risk variants of glioma were associated with splenium of corpus  
12 callosum (SCC), 12 of the 18 variants reported for sleep were related to PLIC or inferior  
13 fronto-occipital fasciculus (IFO), and 26 of the 68 variants associated with bone mineral  
14 density were linked to CST. In addition, more than half of the variants tagged by  
15 uncinate fasciculus (UNC) and fornix (FX) had been implicated with anthropometric  
16 traits. We carried out voxel-wise association analysis for four representative pleiotropic  
17 variants (Methods). The right panel of **Figure 3** illustrated their voxel-wise effect size  
18 patterns in spatial maps. rs593720 and rs13198474 had strong effects in corpus  
19 callosum (GCC, BCC, and SCC), corona radiata (ACR and SCR), and EX, and the two  
20 variants widely tagged psychiatric<sup>93</sup> and neurological<sup>94</sup> disorders, as well as  
21 psychological<sup>95</sup> and cognitive/educational<sup>96</sup> traits. On the other hand, rs77126132  
22 highlighted in SCC and BCC was particularly linked to glioma<sup>88</sup>, and rs798510 in SCR, FX,  
23 and PLIC was associated with several anthropometric traits<sup>97</sup>.

24

### 25 **An atlas of genetic correlations with other complex traits.**

26 Inspired by massive shared risk variants between DTI parameters and other complex  
27 traits, we systematically examined their pairwise genetic correlations by using our  
28 discovery GWAS summary statistics and publicly available summary-level data of other  
29 76 complex traits via LDSC (Methods, **Supplementary Table 18**). There were 760  
30 significant pairs between 60 complex traits and 175 DTI parameters after B-H  
31 adjustment at 0.05 level ( $76 \times 215$  tests,  $P$  range =  $(8.6 \times 10^{-12}, 2.3 \times 10^{-3})$ ),  
32 **Supplementary Table 19**), 38.3% (291/760) of which were detected by PC parameters.

1 We found that DTI parameters were widely correlated with subcortical and WMH  
2 volumes (**Supplementary Fig. 7**), brain-related traits (**Supplementary Fig. 8**), and other  
3 non-brain traits (**Supplementary Fig. 9**). We replicated previously reported genetic  
4 correlations with cognitive/educational traits<sup>24</sup>, drinking behavior<sup>24</sup>, stroke<sup>22,25</sup>, and  
5 MDD<sup>24,25</sup>, and more tract-specific details were revealed. For example, stroke (any  
6 subtypes) and ischemic stroke subtypes<sup>91</sup> (large artery stroke, cardioembolic stroke, and  
7 small vessel stroke) showed broad genetic correlations with corpus callosum (GCC and  
8 BCC), corona radiata (ACR, SCR, and PCR), limb of internal capsule (PLIC, ALIC), EC, PTR,  
9 SLF, SFO, and UNC ( $|gc|$  range = (0.17, 0.39),  $P < 1.7 \times 10^{-3}$ ), matching findings in our  
10 association lookups. We further observed that small vessel stroke subtype had specific  
11 but higher genetic correlations with ALIC and SFO ( $|gc|$  range = (0.56, 0.72),  $P < 1.7 \times$   
12  $10^{-3}$ ). In contrast, there were no significant genetic correlations detected for large artery  
13 and cardioembolic stroke, demonstrating the potentially much stronger genetic links  
14 between white matter tracts and small vessel stroke subtype.

15

16 More importantly, many new genetic correlations were uncovered for brain-related  
17 traits, such as Alzheimer's disease, ADHD, bipolar disorder, chronotype, insomnia,  
18 neuroticism, and risk tolerance. For example, significant genetic correlation was found  
19 between PTR and Alzheimer's disease ( $|gc| = 0.32$ ,  $P = 1.2 \times 10^{-3}$ ), EC and ADHD ( $|gc| =$   
20  $0.18$ ,  $P = 7.1 \times 10^{-5}$ ), and UNC and bipolar disorder ( $|gc| > 0.15$ ,  $P < 7.9 \times 10^{-4}$ ). These  
21 results matched previously reported phenotypical relationships<sup>12,98,99</sup> in neuroscience.  
22 We also found novel significant correlations for non-brain traits, including high blood  
23 pressure, height, BMI, bone mineral density, number of non-cancer illnesses and  
24 treatments, heavy manual or physical work, smoking, coronary artery disease, lung  
25 function, and type 2 diabetes (T2D). For example, high blood pressure was genetically  
26 correlated with many tracts including SFO, SLF, UNC, EC, and ALIC ( $|gc|$  range = (0.10,  
27  $0.26$ ),  $P < 2.2 \times 10^{-3}$ ). Previous research found widespread associations between human  
28 brain and these traits, such as bone mineral density<sup>100</sup>, hypertension<sup>101</sup>, T2D<sup>102</sup>, lung  
29 function<sup>103</sup>, heart disease<sup>104</sup>, and anthropometric traits<sup>105</sup>. Our findings further  
30 illuminate their underlying genetic links. **Figure 4** summaries significant genetic  
31 correlations identified in each tract. We found that 33.3% (112/336) of these tract-trait  
32 genetic correlations can only be detected by PC parameters (**Supplementary Table 20**).

1 For example, most of the significant genetic correlations in EC were solely detected by  
2 its PC parameters, such as ADHD, BMI, cognitive function, neuroticism, and insomnia. In  
3 addition, 12 of the 20 significant genetic correlations with height can only be found by  
4 PC parameters.

5

6 To validate these results, we performed cross-trait PRS separately on our five European  
7 validation GWAS datasets and LDSC on their meta-analyzed summary statistics ( $n =$   
8 6,962, Methods). We found that 681 (89.6%) of these 760 significant pairs can be  
9 validated in at least one of the six validation analyses after B-H adjustment at 0.05 level  
10 (760 tests,  $P$  range =  $(1.7 \times 10^{-10}, 2.9 \times 10^{-2})$ , **Supplementary Table 21**), indicating the  
11 robustness of our findings. We then reran LDSC after meta-analyzed our UKB British  
12 discovery GWAS with these European validation GWAS ( $n = 40,254$ ). The number of  
13 significant pairs increased to 855 (**Supplementary Table 22** and **Supplementary Figs.**  
14 **10-12**). One example of new findings was the genetic correlation between SLF and  
15 schizophrenia<sup>106</sup> ( $|gc| = 0.11, P = 2.3 \times 10^{-3}$ ).

16

17 We explored partial genetic causality among these traits using the latent causal  
18 variable<sup>107</sup> (LCV) model (Methods). As suggested, we conservatively restricted the LCV  
19 analysis to pairs with at least nominally significant genetic correlation ( $P < 0.05$ ),  
20 significant evidence of genetic causality (B-H adjustment at 0.01 level,  $76 \times 215$  tests),  
21 and large genetic causality proportion estimate ( $|GCP| > 0.6$ ), which were extremely  
22 unlikely to be false positives<sup>107</sup>. We observed that high blood pressure was partially  
23 genetically causal for white matter ( $|GCP| > 0.67, P < 2.2 \times 10^{-5}$ , **Supplementary Fig. 13**  
24 and **Supplementary Table 23**). On the other hand, white matter had partially genetically  
25 causal effects on insomnia, under sleep, and neuroticism ( $|GCP| > 0.64, P < 7.1 \times 10^{-8}$ ).  
26 These findings may lead to plausible biological hypotheses in future research and  
27 suggest the existence of different biological mechanisms underlying the atlas of genetic  
28 correlations. More efforts are required to explore causal relationships and the shared  
29 biological processes<sup>108</sup> among these genetically correlated traits.

30

31 **Gene-level analysis.**

1 We carried out MAGMA<sup>109</sup> gene-based association analysis for the 215 DTI parameters  
2 using our discovery GWAS summary statistics (Methods). There were 3,903 significant  
3 gene-level associations ( $P < 1.2 \times 10^{-8}$ , adjusted for 215 phenotypes) between 620 genes  
4 and 179 DTI parameters (**Supplementary Table 24**), 153 of the associated genes can  
5 only be discovered by PC parameters. We replicated 99 of 112 MAGMA genes reported  
6 in Zhao, et al.<sup>24</sup>, 8 white matter-associated genes (*SH3PXD2A*, *NBEAL1*, *C1QL1*, *COL4A2*,  
7 *TRIM47*, *TRIM65*, *UNC13D*, *FBF1*) in Verhaaren, et al.<sup>55</sup>, 4 (*VCAN*, *TRIM47*, *XRCC4*,  
8 *HAPLN1*) in Rutten-Jacobs, et al.<sup>25</sup>, 3 (*ALDH2*, *PLEKHG1*, *TRIM65*) in Traylor, et al.<sup>26</sup>, 3  
9 (*ALDH2*, *PLEKHG1*, *TRIM65*) in Hofer, et al.<sup>110</sup>, 2 (*TRIM47*, *TRIM65*) in Fornage, et al.<sup>27</sup>,  
10 and 2 (*GNA12*, *GNA13*) in Sprooten, et al.<sup>111</sup>. Most of the other genes had not been  
11 implicated with white matter. Many of our MAGMA genes had been linked to other  
12 complex traits (**Supplementary Table 25**), such as 70 genes in Anney, et al.<sup>93</sup> for autism  
13 spectrum disorder or schizophrenia, 50 in Morris, et al.<sup>78</sup> for heel bone mineral density,  
14 38 in Hoffmann, et al.<sup>112</sup> for blood pressure variation, 51 in Linnér, et al.<sup>69</sup> for risk  
15 tolerance, 36 in Rask-Andersen, et al.<sup>97</sup> for body fat distribution, and 26 in Hill, et al.<sup>113</sup>  
16 for neuroticism.

17  
18 Next, we mapped significant variants ( $P < 2.3 \times 10^{-10}$ ) to genes according to physical  
19 position, expression quantitative trait loci (eQTL) association, and 3D chromatin (Hi-C)  
20 interaction via FUMA<sup>43</sup> (Methods). FUMA yielded 1,189 new associated genes (1,630 in  
21 total) that were not discovered in MAGMA analysis (**Supplementary Table 26**),  
22 replicating 286 of the 292 FUMA genes identified in Zhao, et al.<sup>24</sup> and more other genes  
23 in previous studies of white matter, such as *PDCD11*<sup>55</sup>, *ACOX1*<sup>55</sup>, *CLDN23*<sup>110</sup>,  
24 *EFEMP1*<sup>25,26,55</sup>, and *IRS2*<sup>110</sup>. More overlapped genes were also observed between white  
25 matter and other traits (**Supplementary Table 27**). Particularly, 876 FUMA genes were  
26 solely mapped by significant Hi-C interactions in brain tissues (**Supplementary Table 28**),  
27 demonstrating the power of integrating chromatin interaction profiles in GWAS of white  
28 matter.

29  
30 We then explored the gene-level pleiotropy between white matter and 79 complex  
31 traits, including nine neurological and psychiatric disorders<sup>114</sup> studied in Sey, et al.<sup>114</sup>  
32 and (other) traits studied in our genetic correlation analysis. For brain-related traits, the

1 associated genes were predicted by the recently developed Hi-C-coupled MAGMA<sup>114</sup>  
2 (H-MAGMA) tool (Methods). Traditional MAGMA<sup>109</sup> was used for non-brain GWAS.  
3 H-MAGMA prioritized 737 significant genes for white matter ( $P < 6.3 \times 10^{-9}$ , adjusted for  
4 215 phenotypes and two brain tissue types, **Supplementary Table 29**), and we focused  
5 on 329 genes that can be replicated in our meta-analyzed European validation GWAS ( $n$   
6 = 6,962) at nominal significance level ( $P < 0.05$ , **Supplementary Table 30**). We found  
7 that 298 of these 329 genes were associated with at least one of 57 complex traits  
8 (**Supplementary Table 31**). **Figure 5** and **Supplementary Table 32** display the number of  
9 overlapped genes between 57 complex traits and 21 white matter tracts. Most white  
10 matter tracts have many pleiotropic genes with other complex traits, aligning with  
11 patterns in association lookups and genetic correlation analysis. For example,  
12 schizophrenia had 80 overlapped genes with SLF, 71 with CGC, 68 with EC, and 65 with  
13 SCR. Global white matter changes in schizophrenia patients had been observed<sup>106,115,116</sup>.  
14 Particularly, 230 white matter H-MAGMA genes had been identified in Sey, et al.<sup>114</sup> for  
15 nine neurological and psychiatric disorders (**Supplementary Table 33**). *NSF*<sup>117</sup>, *GFAP*<sup>118</sup>,  
16 *TRIM27*<sup>72</sup>, *HLA-DRA*<sup>117,119</sup>, and *KANSL1*<sup>76,95</sup> were associated with five of these disorders,  
17 and another 69 genes were linked to at least three different disorders (**Supplementary**  
18 **Fig. 14**). In summary, our analysis largely expands the overview of gene-level pleiotropy,  
19 informing the shared genetic influences between white matter and other complex traits.

20

## 21 **Biological annotations.**

22 To gain more insights into biological mechanisms, we performed several analyses to  
23 explore biological interpretations of our discovery GWAS results. First, MAGMA gene-  
24 property<sup>109</sup> analysis was performed for 13 GTEx<sup>120</sup> (v8) brain tissues to examine whether  
25 the tissue-specific gene expression levels were related to significance between genes  
26 and DTI parameters (Methods). After Bonferroni adjustment ( $13 \times 215$  tests), we  
27 detected 57 significant associations for gene expression in brain cerebellar hemisphere  
28 and cerebellum tissues ( $P < 1.8 \times 10^{-5}$ , **Supplementary Fig. 15** and **Supplementary Table**  
29 **34**), suggesting that genes with higher transcription levels on white matter-presented  
30 regions also had stronger genetic associations with DTI parameters. In contrast, no  
31 signals were observed on regions primarily dominated by grey matter, such as basal  
32 ganglia and cortex. We also performed chromatin-based annotation analysis by

1 stratified LDSC<sup>121</sup> for 490 cell-type/tissue-specific DNase I hypersensitivity and activating  
2 histone marker annotations (Methods). After Bonferroni adjustment (490 × 215 tests),  
3 nine brain tissue histone annotations had significantly enriched contributions to per-SNP  
4 heritability for seven tracts ( $P < 4.5 \times 10^{-7}$ , **Supplementary Table 35**).

5  
6 MAGMA<sup>109</sup> competitive gene-set analysis was performed for 15,496 gene sets (5,500  
7 curated gene sets and 9,996 GO terms, Methods). We found 180 significant gene sets  
8 after Bonferroni adjustment (15,496 × 215 tests,  $P < 1.5 \times 10^{-8}$ , **Supplementary Table 36**).  
9 The top five frequently prioritized gene sets were “dacosta uv response via ercc3 dn”  
10 (M4500), “dacosta uv response via ercc3 common dn” (M13522), “graessmann  
11 apoptosis by doxorubicin dn” (M1105), “gobert oligodendrocyte differentiation dn”  
12 (M2369), and “blalock alzheimers disease up” (M12921). M4500 and M13522 are  
13 *ERCC3*-associated gene sets related to xeroderma pigmentosum (XP) and  
14 trichothiodystrophy (TTD) syndromes, which are genetic disorders caused by a defective  
15 nucleotide excision repair system<sup>122,123</sup>. In addition to skin symptoms, patients of XP and  
16 TTD often reported various neurological deteriorations and white matter abnormalities,  
17 such as intellectual impairment<sup>124</sup>, myelin structures degradation<sup>125</sup>, and diffuse  
18 dysmyelination<sup>126</sup>. M1105 regulates the apoptosis of breast cancer cells in response to  
19 doxorubicin treatment. Clinical research found that breast cancer chemotherapy like  
20 doxorubicin was neurotoxic<sup>127</sup> and can cause therapy-induced brain structural changes  
21 and decline in white matter integrity<sup>128</sup>. M2369 plays a critical role in oligodendrocyte  
22 differentiation, which mediates the repair of white matter after damaging events<sup>129</sup>, and  
23 M12921 is related to the pathogenesis of Alzheimer's disease<sup>130</sup>.

24  
25 Several gene sets of rat sarcoma (Ras) proteins, small GTPases, and rho family GTPases  
26 were also prioritized by MAGMA, such as “go regulation of small gtpase mediated signal  
27 transduction” (GO: 0051056), “go small gtpase mediated signal transduction” (GO:  
28 0007264), “go re gelation of ras protein signal transduction” (GO: 0046578), “go ras  
29 protein signal transduction” (GO: 0007265), and “reactome signaling by rho gtpases”  
30 (M501). Ras proteins activity is involved in developmental processes and abnormalities  
31 of neural cells in central nervous system<sup>131,132</sup>; small and rho family GTPases play crucial  
32 roles in basic cellular processes during the entire neurodevelopment process and are



1 closely connected to several neurological disorders<sup>133-135</sup>. We also observed significant  
2 enrichment in neuron-related pathways, including “go neurogenesis” (GO: 0022008),  
3 “go neuron differentiation” (GO: 0030182), “go neuron development” (GO: 0048666),  
4 “go regulation of neuron differentiation” (GO: 0045664), and “go regulation of nervous  
5 system development” (GO: 0051960). Finally, we applied DEPICT<sup>136</sup> gene-set enrichment  
6 testing for 10,968 pre-constituted gene sets (Methods), 7 of which survived Bonferroni  
7 adjustment ( $10,968 \times 215$  tests,  $P < 2.1 \times 10^{-8}$ ), such as two gene sets involved in Ras  
8 proteins and small GTPases (GO: 0046578 and GO: 0005083) and another two for  
9 vasculature and blood vessel developments (GO: 0001944 and GO: 0001568,  
10 **Supplementary Table 37**). More MAGMA enriched gene sets can also be detected by  
11 DEPICT when the significance threshold was relaxed to  $6.5 \times 10^{-6}$  (i.e., not adjusted for  
12 testing 215 phenotypes), such as GO: 0051960, GO: 0045664, GO: 0007264, and GO:  
13 0051056. In summary, our results provide many insights into the underlying biological  
14 processes of white matter, suggesting that DTI measures could be useful in  
15 understanding the shared pathophysiological pathways between white matter and  
16 multiple diseases and disorders.

17

## 18 **DISCUSSION**

19 In this study, we analyzed the genetic architecture of brain white matter using dMRI  
20 scans of 42,279 subjects collected from five publicly accessible data resources. Through  
21 a genome-wide analysis, we identified hundreds of previously unknown variants and  
22 genes for white matter microstructural differences. Many previously reported genetic  
23 hits were confirmed in our discovery GWAS, and we further validated our discovery  
24 GWAS in a few replication cohorts. We evaluated the genetic relationships between  
25 white matter and a wide variety of complex traits in association lookups, genetic  
26 correlation estimation, and gene-level analysis. A large proportion of our findings were  
27 revealed by unconventional tract-specific PC parameters. Bioinformatics analyses found  
28 tissue-specific functional enrichments and lots of enriched biological pathways.  
29 Together, these results suggest the value of large-scale neuroimaging data integration  
30 and the application of tract-specific FPCA in studying the genetics of human brain.

31

1 One limitation of the present study is that the majority of publicly available dMRI data  
2 are from subjects of European ancestry and our discovery GWAS focused on UKB British  
3 individuals. Such GWAS strategy can efficiently avoid false discoveries due to population  
4 stratifications and heterogeneities across studies<sup>22,137</sup>, but may raise the question that  
5 to what degree the research findings can be generalized and applied on global  
6 populations<sup>138,139</sup>. In our analysis, we found that the UKB British-derived PRS were still  
7 widely significant in Hispanic and African American testing cohorts but had reduced  
8 performances, especially in African American cohort. This may indicate that the genetic  
9 architecture of white matter is similar but not the same across different populations.  
10 Identifying the cross-population and population-specific components of genetic factors  
11 for human brain could be an interesting future topic. As more non-European  
12 neuroimaging data become available (e.g., the ongoing CHIMGEN project<sup>140</sup> in Chinese  
13 population), global integration efforts are needed to study the comparative genetic  
14 architectures and to explore the multi-ethnic genetics relationships among brain and  
15 other human complex traits.

16

#### 17 **URLs.**

18 Brain Imaging GWAS Summary Statistics, <https://github.com/BIG-S2/GWAS>;  
19 Brain Imaging Genetics Knowledge Portal, <https://bigkp.web.unc.edu/>;  
20 UKB Imaging Pipeline, [https://git.fmrib.ox.ac.uk/falmagro/UK\\_biobank\\_pipeline\\_v\\_1](https://git.fmrib.ox.ac.uk/falmagro/UK_biobank_pipeline_v_1);  
21 ENIGMA-DTI Pipeline, <http://enigma.ini.usc.edu/protocols/dti-protocols/>;  
22 PLINK, <https://www.cog-genomics.org/plink2/>;  
23 GCTA & fastGWA, <http://cnsgenomics.com/software/gcta/>;  
24 METAL, <https://genome.sph.umich.edu/wiki/METAL>;  
25 Michigan Imputation Server, <https://imputationserver.sph.umich.edu/>;  
26 FUMA, <http://fuma.ctglab.nl/>;  
27 MGAMA, <https://ctg.cncr.nl/software/magma>;  
28 H-MAGMA, <https://github.com/thewonlab/H-MAGMA>;  
29 LDSC, <https://github.com/bulik/ldsc/>;  
30 LCV, <https://github.com/lukejoconnor/LCV/>;  
31 DEPICT, <https://github.com/perslab/depict>;  
32 FINDOR, <https://github.com/gkichaev/FINDOR>;

- 1 SuSiE, <https://github.com/stephenslab/susieR>;
- 2 PolyFun, <https://github.com/omerwe/polyfun>;
- 3 NHGRI-EBI GWAS Catalog, <https://www.ebi.ac.uk/gwas/home>;
- 4 The atlas of GWAS Summary Statistics, <http://atlas.ctglab.nl/>;

5

## 6 **METHODS**

7 Methods are available in the **Methods** section.

8 *Note: One supplementary information pdf file and one supplementary zip file are*  
9 *available.*

10

## 11 **ACKNOWLEDGEMENTS**

12 This research was partially supported by U.S. NIH grants MH086633 (H.Z.) and  
13 MH116527 (TF.L.). We thank Sophia Cui, Xiaopeng Zong, and Peter Vandelaar for  
14 helpful conversations. We thank the individuals represented in the UK Biobank, ABCD,  
15 HCP, PING, and PNC studies for their participation and the research teams for their work  
16 in collecting, processing and disseminating these datasets for analysis. We gratefully  
17 acknowledge all the studies and databases that made GWAS summary data available.

18 This research has been conducted using the UK Biobank resource (application number  
19 22783), subject to a data transfer agreement. Part of the data collection and sharing for  
20 this project was funded by the Pediatric Imaging, Neurocognition and Genetics Study  
21 (PING) (U.S. National Institutes of Health Grant RC2DA029475). PING is funded by the  
22 National Institute on Drug Abuse and the Eunice Kennedy Shriver National Institute of  
23 Child Health & Human Development. PING data are disseminated by the PING  
24 Coordinating Center at the Center for Human Development, University of California, San  
25 Diego. Support for the collection of the PNC datasets was provided by grant  
26 RC2MH089983 awarded to Raquel Gur and RC2MH089924 awarded to Hakon  
27 Hakonarson. All PNC subjects were recruited through the Center for Applied Genomics  
28 at The Children's Hospital in Philadelphia. Part of the data used in the preparation of this  
29 article were obtained from the Adolescent Brain Cognitive Development (ABCD) Study  
30 (<https://abcdstudy.org>), held in the NIMH Data Archive (NDA). This is a multisite,  
31 longitudinal study designed to recruit more than 10,000 children age 9-10 and follow  
32 them over 10 years into early adulthood. The ABCD Study is supported by the National

1 Institutes of Health and additional federal partners under award numbers  
2 U01DA041022, U01DA041028, U01DA041048, U01DA041089, U01DA041106,  
3 U01DA041117, U01DA041120, U01DA041134, U01DA041148, U01DA041156,  
4 U01DA041174, U24DA041123, U24DA041147, U01DA041093, and U01DA041025. A full  
5 list of supporters is available at <https://abcdstudy.org/federal-partners.html>. A listing of  
6 participating sites and a complete listing of the study investigators can be found at  
7 <https://abcdstudy.org/scientists/workgroups/>. ABCD consortium investigators designed  
8 and implemented the study and/or provided data but did not necessarily participate in  
9 analysis or writing of this report. This manuscript reflects the views of the authors and  
10 may not reflect the opinions or views of the NIH or ABCD consortium investigators. HCP  
11 data were provided by the Human Connectome Project, WU-Minn Consortium (Principal  
12 Investigators: David Van Essen and Kamil Ugurbil; 1U54MH091657) funded by the 16  
13 NIH Institutes and Centers that support the NIH Blueprint for Neuroscience Research;  
14 and by the McDonnell Center for Systems Neuroscience at Washington University.

15

#### 16 **AUTHOR CONTRIBUTIONS**

17 B.Z., H.Z., Y.L., and J.S. designed the study. B.Z., TF. L, Y.Y., X.W., and TY. L analyzed the  
18 data. TF. L, Y.S., Z.Z., Y.Y., X.W., TY. L, and D.X., downloaded the datasets, preprocessed  
19 MRI data, and undertook the quantity controls. B.Z. and H.Z. wrote the manuscript with  
20 feedback from all authors.

21

#### 22 **COMPETETING FINANCIAL INTERESTS**

23 The authors declare no competing financial interests.

24

#### 25 **REFERENCES**

26

- 27 1. van den Heuvel, M.P. & Sporns, O. A cross-disorder connectome landscape of  
28 brain dysconnectivity. *Nature reviews neuroscience* **20**, 435-446 (2019).
- 29 2. Hagmann, P. *et al.* Mapping the structural core of human cerebral cortex. *PLoS*  
30 *biology* **6**(2008).

- 1 3. Zielinski, B.A., Gennatas, E.D., Zhou, J. & Seeley, W.W. Network-level structural  
2 covariance in the developing brain. *Proceedings of the National Academy of*  
3 *Sciences* **107**, 18191-18196 (2010).
- 4 4. Fields, R.D. White matter in learning, cognition and psychiatric disorders. *Trends*  
5 *in neurosciences* **31**, 361-370 (2008).
- 6 5. Filley, C.M. & Fields, R.D. White matter and cognition: making the connection.  
7 *Journal of neurophysiology* **116**, 2093-2104 (2016).
- 8 6. Kuceyeski, A., Maruta, J., Relkin, N. & Raj, A. The Network Modification (NeMo)  
9 Tool: elucidating the effect of white matter integrity changes on cortical and  
10 subcortical structural connectivity. *Brain connectivity* **3**, 451-463 (2013).
- 11 7. Bathelt, J., Scerif, G., Nobre, A. & Astle, D. Whole-brain white matter  
12 organization, intelligence, and educational attainment. *Trends in neuroscience*  
13 *and education* **15**, 38-47 (2019).
- 14 8. Vaquero, L., Rodríguez-Fornells, A. & Reiterer, S.M. The left, the better:  
15 white-matter brain integrity predicts foreign language imitation ability. *Cerebral*  
16 *Cortex* **27**, 3906-3917 (2017).
- 17 9. Wu, Z.-M. *et al.* White matter microstructural alterations in children with ADHD:  
18 categorical and dimensional perspectives. *Neuropsychopharmacology* **42**,  
19 572-580 (2017).
- 20 10. Zou, K. *et al.* Alterations of white matter integrity in adults with major depressive  
21 disorder: a magnetic resonance imaging study. *Journal of psychiatry &*  
22 *neuroscience: JPN* **33**, 525 (2008).
- 23 11. Cetin-Karayumak, S. *et al.* White matter abnormalities across the lifespan of  
24 schizophrenia: a harmonized multi-site diffusion MRI study. *Molecular*  
25 *psychiatry*, 1-12 (2019).
- 26 12. Versace, A. *et al.* Elevated left and reduced right orbitomedial prefrontal  
27 fractional anisotropy in adults with bipolar disorder revealed by tract-based  
28 spatial statistics. *Archives of general psychiatry* **65**, 1041-1052 (2008).
- 29 13. De Santis, S. *et al.* Evidence of early microstructural white matter abnormalities  
30 in multiple sclerosis from multi-shell diffusion MRI. *NeuroImage: Clinical* **22**,  
31 101699 (2019).

- 1 14. Lee, S. *et al.* White matter hyperintensities are a core feature of Alzheimer's  
2 disease: evidence from the dominantly inherited Alzheimer network. *Annals of*  
3 *neurology* **79**, 929-939 (2016).
- 4 15. Hess, C., Christine, C., Apple, A., Dillon, W. & Aminoff, M. Changes in the  
5 thalamus in atypical parkinsonism detected using shape analysis and diffusion  
6 tensor imaging. *American Journal of Neuroradiology* **35**, 897-903 (2014).
- 7 16. Veselý, B. & Rektor, I. The contribution of white matter lesions (WML) to  
8 Parkinson's disease cognitive impairment symptoms: a critical review of the  
9 literature. *Parkinsonism & related disorders* **22**, S166-S170 (2016).
- 10 17. Basser, P.J., Mattiello, J. & LeBihan, D. Estimation of the effective self-diffusion  
11 tensor from the NMR spin echo. *Journal of Magnetic Resonance, Series B* **103**,  
12 247-254 (1994).
- 13 18. Grieve, S., Williams, L., Paul, R., Clark, C. & Gordon, E. Cognitive aging, executive  
14 function, and fractional anisotropy: a diffusion tensor MR imaging study.  
15 *American Journal of Neuroradiology* **28**, 226-235 (2007).
- 16 19. Basser, P. & Pierpaoli, C. Microstructural and physiological features of tissues  
17 elucidated by quantitative-diffusion-tensor MRI. *Journal of magnetic resonance.*  
18 *Series B* **111**, 209 (1996).
- 19 20. Ennis, D.B. & Kindlmann, G. Orthogonal tensor invariants and the analysis of  
20 diffusion tensor magnetic resonance images. *Magnetic Resonance in Medicine:*  
21 *An Official Journal of the International Society for Magnetic Resonance in*  
22 *Medicine* **55**, 136-146 (2006).
- 23 21. Vuoksimaa, E. *et al.* Heritability of white matter microstructure in late middle  
24 age: A twin study of tract-based fractional anisotropy and absolute diffusivity  
25 indices. *Human brain mapping* **38**, 2026-2036 (2017).
- 26 22. Elliott, L.T. *et al.* Genome-wide association studies of brain imaging phenotypes  
27 in UK Biobank. *Nature* **562**, 210-216 (2018).
- 28 23. Chiang, M.-C. *et al.* Genetics of white matter development: a DTI study of 705  
29 twins and their siblings aged 12 to 29. *Neuroimage* **54**, 2308-2317 (2011).
- 30 24. Zhao, B. *et al.* Large-scale GWAS reveals genetic architecture of brain white  
31 matter microstructure and genetic overlap with cognitive and mental health  
32 traits (n = 17,706). *Molecular Psychiatry* (2019).

- 1 25. Rutten-Jacobs, L.C. *et al.* Genetic study of white matter integrity in UK Biobank  
2 (N= 8448) and the overlap with stroke, depression, and dementia. *Stroke* **49**,  
3 1340-1347 (2018).
- 4 26. Traylor, M. *et al.* Genetic variation in PLEKHG1 is associated with white matter  
5 hyperintensities (n= 11,226). *Neurology* **92**, e749-e757 (2019).
- 6 27. Fornage, M. *et al.* Genome-wide association studies of cerebral white matter  
7 lesion burden: the CHARGE consortium. *Annals of neurology* **69**, 928-939 (2011).
- 8 28. Adib-Samii, P. *et al.* 17q25 Locus is associated with white matter hyperintensity  
9 volume in ischemic stroke, but not with lacunar stroke status. *Stroke* **44**,  
10 1609-1615 (2013).
- 11 29. O'Connor, L.J. *et al.* Extreme polygenicity of complex traits is explained by  
12 negative selection. *The American Journal of Human Genetics* **105**, 456-476  
13 (2019).
- 14 30. Adib-Samii, P. *et al.* Genetic architecture of white matter hyperintensities differs  
15 in hypertensive and nonhypertensive ischemic stroke. *Stroke* **46**, 348-353 (2015).
- 16 31. Sudlow, C. *et al.* UK biobank: an open access resource for identifying the causes  
17 of a wide range of complex diseases of middle and old age. *PLoS Medicine* **12**,  
18 e1001779 (2015).
- 19 32. Casey, B. *et al.* The adolescent brain cognitive development (ABCD) study:  
20 imaging acquisition across 21 sites. *Developmental cognitive neuroscience* **32**,  
21 43-54 (2018).
- 22 33. Somerville, L.H. *et al.* The Lifespan Human Connectome Project in Development:  
23 A large-scale study of brain connectivity development in 5–21 year olds.  
24 *NeuroImage* **183**, 456-468 (2018).
- 25 34. Jernigan, T.L. *et al.* The pediatric imaging, neurocognition, and genetics (PING)  
26 data repository. *Neuroimage* **124**, 1149-1154 (2016).
- 27 35. Satterthwaite, T.D. *et al.* Neuroimaging of the Philadelphia neurodevelopmental  
28 cohort. *Neuroimage* **86**, 544-553 (2014).
- 29 36. Jahanshad, N. *et al.* Multi-site genetic analysis of diffusion images and voxelwise  
30 heritability analysis: A pilot project of the ENIGMA–DTI working group.  
31 *Neuroimage* **81**, 455-469 (2013).



- 1 37. Kochunov, P. *et al.* Multi-site study of additive genetic effects on fractional  
2 anisotropy of cerebral white matter: comparing meta and megaanalytical  
3 approaches for data pooling. *Neuroimage* **95**, 136-150 (2014).
- 4 38. Mattingsdal, M. *et al.* Pathway analysis of genetic markers associated with a  
5 functional MRI faces paradigm implicates polymorphisms in calcium responsive  
6 pathways. *Neuroimage* **70**, 143-149 (2013).
- 7 39. Azadeh, S. *et al.* Integrative Bayesian analysis of neuroimaging-genetic data  
8 through hierarchical dimension reduction. in *2016 IEEE 13th International*  
9 *Symposium on Biomedical Imaging (ISBI)* 824-828 (IEEE, 2016).
- 10 40. Yang, J., Lee, S.H., Goddard, M.E. & Visscher, P.M. GCTA: a tool for genome-wide  
11 complex trait analysis. *The American Journal of Human Genetics* **88**, 76-82  
12 (2011).
- 13 41. Jiang, L. *et al.* A resource-efficient tool for mixed model association analysis of  
14 large-scale data. *Nature genetics* **51**, 1749 (2019).
- 15 42. Consortium, G.P. A global reference for human genetic variation. *Nature* **526**,  
16 68-74 (2015).
- 17 43. Watanabe, K., Taskesen, E., Bochoven, A. & Posthuma, D. Functional mapping  
18 and annotation of genetic associations with FUMA. *Nature Communications* **8**,  
19 1826 (2017).
- 20 44. Wang, G., Sarkar, A.K., Carbonetto, P. & Stephens, M. A simple new approach to  
21 variable selection in regression, with application to genetic fine-mapping.  
22 *bioRxiv*, 501114 (2019).
- 23 45. Weissbrod, O. *et al.* Functionally-informed fine-mapping and polygenic  
24 localization of complex trait heritability. *BioRxiv*, 807792 (2019).
- 25 46. Martin, A.R., Daly, M.J., Robinson, E.B., Hyman, S.E. & Neale, B.M. Predicting  
26 polygenic risk of psychiatric disorders. *Biological psychiatry* **86**, 97-109 (2019).
- 27 47. Bulik-Sullivan, B. *et al.* An atlas of genetic correlations across human diseases  
28 and traits. *Nature Genetics* **47**, 1236-1241 (2015).
- 29 48. Jansen, P.R. *et al.* Genome-wide analysis of insomnia in 1,331,010 individuals  
30 identifies new risk loci and functional pathways. *Nature Genetics* **51**, 394-403  
31 (2019).

- 1 49. Skol, A.D., Scott, L.J., Abecasis, G.R. & Boehnke, M. Joint analysis is more efficient  
2 than replication-based analysis for two-stage genome-wide association studies.  
3 *Nature Genetics* **38**, 209-213 (2006).
- 4 50. Jansen, I.E. *et al.* Genome-wide meta-analysis identifies new loci and functional  
5 pathways influencing Alzheimer's disease risk. *Nature genetics* **51**, 404-413  
6 (2019).
- 7 51. Bycroft, C. *et al.* The UK Biobank resource with deep phenotyping and genomic  
8 data. *Nature* **562**, 203-209 (2018).
- 9 52. Kichaev, G. *et al.* Leveraging polygenic functional enrichment to improve GWAS  
10 power. *The American Journal of Human Genetics* **104**, 65-75 (2019).
- 11 53. Buniello, A. *et al.* The NHGRI-EBI GWAS Catalog of published genome-wide  
12 association studies, targeted arrays and summary statistics 2019. *Nucleic Acids*  
13 *Research* **47**, D1005-D1012 (2018).
- 14 54. van der Meer, D. *et al.* Brain scans from 21,297 individuals reveal the genetic  
15 architecture of hippocampal subfield volumes. *Molecular Psychiatry*, in press.  
16 (2018).
- 17 55. Verhaaren, B.F. *et al.* Multiethnic genome-wide association study of cerebral  
18 white matter hyperintensities on MRI. *Circulation: Cardiovascular Genetics* **8**,  
19 398-409 (2015).
- 20 56. Vojinovic, D. *et al.* Genome-wide association study of 23,500 individuals  
21 identifies 7 loci associated with brain ventricular volume. *Nature*  
22 *communications* **9**, 1-11 (2018).
- 23 57. Klein, M. *et al.* Genetic markers of ADHD-related variations in intracranial  
24 volume. *American Journal of Psychiatry* **176**, 228-238 (2019).
- 25 58. Hibar, D.P. *et al.* Common genetic variants influence human subcortical brain  
26 structures. *Nature* **520**, 224-229 (2015).
- 27 59. Luo, Q. *et al.* Association of a Schizophrenia-Risk Nonsynonymous Variant With  
28 Putamen Volume in Adolescents: A Voxelwise and Genome-Wide Association  
29 Study. *JAMA psychiatry* **76**, 435-445 (2019).
- 30 60. Hashimoto, R. *et al.* Common variants at 1p36 are associated with superior  
31 frontal gyrus volume. *Translational psychiatry* **4**, e472-e472 (2014).

- 1 61. Ikram, M.A. *et al.* Common variants at 6q22 and 17q21 are associated with  
2 intracranial volume. *Nature Genetics* **44**, 539-544 (2012).
- 3 62. Sprooten, E. *et al.* Common genetic variants and gene expression associated with  
4 white matter microstructure in the human brain. *Neuroimage* **97**, 252-261  
5 (2014).
- 6 63. Shen, L. *et al.* Whole genome association study of brain-wide imaging  
7 phenotypes for identifying quantitative trait loci in MCI and AD: A study of the  
8 ADNI cohort. *Neuroimage* **53**, 1051-1063 (2010).
- 9 64. Chung, J. *et al.* Genome-wide association study of Alzheimer's disease  
10 endophenotypes at prediagnosis stages. *Alzheimer's & Dementia* **14**, 623-633  
11 (2018).
- 12 65. Chen, C.-H. *et al.* Leveraging genome characteristics to improve gene discovery  
13 for putamen subcortical brain structure. *Scientific Reports* **7**, 15736 (2017).
- 14 66. Christopher, L. *et al.* A variant in PPP4R3A protects against alzheimer-related  
15 metabolic decline. *Annals of neurology* **82**, 900-911 (2017).
- 16 67. Luciano, M. *et al.* Association analysis in over 329,000 individuals identifies 116  
17 independent variants influencing neuroticism. *Nature Genetics* **50**, 6-11 (2018).
- 18 68. Baselmans, B.M. *et al.* Multivariate genome-wide analyses of the well-being  
19 spectrum. *Nature genetics* **51**, 445-451 (2019).
- 20 69. Linnér, R.K. *et al.* Genome-wide association analyses of risk tolerance and risky  
21 behaviors in over 1 million individuals identify hundreds of loci and shared  
22 genetic influences. *Nature Genetics* **51**, 245-257 (2019).
- 23 70. Davies, G. *et al.* Study of 300,486 individuals identifies 148 independent genetic  
24 loci influencing general cognitive function. *Nature Communications* **9**, 2098  
25 (2018).
- 26 71. Lee, J.J. *et al.* Gene discovery and polygenic prediction from a genome-wide  
27 association study of educational attainment in 1.1 million individuals. *Nature*  
28 *Genetics* **50**, 1112–1121 (2018).
- 29 72. Ikeda, M. *et al.* Genome-wide association study detected novel susceptibility  
30 genes for schizophrenia and shared trans-populations/diseases genetic effect.  
31 *Schizophrenia bulletin* **45**, 824-834 (2019).

- 1 73. Hyde, C.L. *et al.* Identification of 15 genetic loci associated with risk of major  
2 depression in individuals of European descent. *Nature genetics* **48**, 1031 (2016).
- 3 74. Ruderfer, D.M. *et al.* Polygenic dissection of diagnosis and clinical dimensions of  
4 bipolar disorder and schizophrenia. *Molecular psychiatry* **19**, 1017 (2014).
- 5 75. Lesch, K.-P. *et al.* Molecular genetics of adult ADHD: converging evidence from  
6 genome-wide association and extended pedigree linkage studies. *Journal of*  
7 *neural transmission* **115**, 1573-1585 (2008).
- 8 76. Grove, J. *et al.* Identification of common genetic risk variants for autism  
9 spectrum disorder. *Nature genetics* **51**, 431 (2019).
- 10 77. Allen, H.L. *et al.* Hundreds of variants clustered in genomic loci and biological  
11 pathways affect human height. *Nature* **467**, 832-838 (2010).
- 12 78. Morris, J.A. *et al.* An atlas of genetic influences on osteoporosis in humans and  
13 mice. *Nature genetics* **51**, 258-266 (2019).
- 14 79. Medina-Gomez, C. *et al.* Life-course genome-wide association study  
15 meta-analysis of total body BMD and assessment of age-specific effects. *The*  
16 *American Journal of Human Genetics* **102**, 88-102 (2018).
- 17 80. Liu, M. *et al.* Association studies of up to 1.2 million individuals yield new insights  
18 into the genetic etiology of tobacco and alcohol use. *Nature genetics* **51**, 237-244  
19 (2019).
- 20 81. Sanchez-Roige, S. *et al.* Genome-wide association study meta-analysis of the  
21 Alcohol Use Disorders Identification Test (AUDIT) in two population-based  
22 cohorts. *American Journal of Psychiatry*, appi. ajp. 2018.18040369 (2018).
- 23 82. Kouri, N. *et al.* Genome-wide association study of corticobasal degeneration  
24 identifies risk variants shared with progressive supranuclear palsy. *Nature*  
25 *communications* **6**, 7247 (2015).
- 26 83. Simon-Sanchez, J. *et al.* Genome-wide association study reveals genetic risk  
27 underlying Parkinson's disease. *Nature genetics* **41**, 1308 (2009).
- 28 84. Kunkle, B.W. *et al.* Genetic meta-analysis of diagnosed Alzheimer's disease  
29 identifies new risk loci and implicates A $\beta$ , tau, immunity and lipid processing.  
30 *Nature genetics* **51**, 414 (2019).
- 31 85. Beecham, A.H. *et al.* Analysis of immune-related loci identifies 48 new  
32 susceptibility variants for multiple sclerosis. *Nature genetics* **45**, 1353 (2013).

- 1 86. Dashti, H. *et al.* GWAS in 446,118 European adults identifies 78 genetic loci for  
2 self-reported habitual sleep duration supported by accelerometer-derived  
3 estimates. *bioRxiv*, 274977 (2018).
- 4 87. Jones, S.E. *et al.* Genome-wide association analyses of chronotype in 697,828  
5 individuals provides insights into circadian rhythms. *Nature communications* **10**,  
6 343 (2019).
- 7 88. Melin, B.S. *et al.* Genome-wide association study of glioma subtypes identifies  
8 specific differences in genetic susceptibility to glioblastoma and  
9 non-glioblastoma tumors. *Nature genetics* **49**, 789 (2017).
- 10 89. Kinnersley, B. *et al.* Genome-wide association study identifies multiple  
11 susceptibility loci for glioma. *Nature communications* **6**, 1-9 (2015).
- 12 90. Traylor, M. *et al.* Genetic risk factors for ischaemic stroke and its subtypes (the  
13 METASTROKE collaboration): a meta-analysis of genome-wide association  
14 studies. *The Lancet Neurology* **11**, 951-962 (2012).
- 15 91. Malik, R. *et al.* Multiancestry genome-wide association study of 520,000 subjects  
16 identifies 32 loci associated with stroke and stroke subtypes. *Nature genetics* **50**,  
17 524-537 (2018).
- 18 92. Dichgans, M. *et al.* Shared genetic susceptibility to ischemic stroke and coronary  
19 artery disease: a genome-wide analysis of common variants. *Stroke* **45**, 24-36  
20 (2014).
- 21 93. Anney, R.J.L. *et al.* Meta-analysis of GWAS of over 16,000 individuals with autism  
22 spectrum disorder highlights a novel locus at 10q24.32 and a significant overlap  
23 with schizophrenia. *Molecular Autism* **8**, 21 (2017).
- 24 94. Chang, D. *et al.* A meta-analysis of genome-wide association studies identifies 17  
25 new Parkinson's disease risk loci. *Nature genetics* **49**, 1511 (2017).
- 26 95. Nagel, M. *et al.* Meta-analysis of genome-wide association studies for  
27 neuroticism in 449,484 individuals identifies novel genetic loci and pathways.  
28 *Nature Genetics* **50**, 920 (2018).
- 29 96. Lam, M. *et al.* Large-Scale Cognitive GWAS Meta-Analysis Reveals Tissue-Specific  
30 Neural Expression and Potential Nootropic Drug Targets. *Cell reports* **21**,  
31 2597-2613 (2017).

- 1 97. Rask-Andersen, M., Karlsson, T., Ek, W.E. & Johansson, Å. Genome-wide  
2 association study of body fat distribution identifies adiposity loci and sex-specific  
3 genetic effects. *Nature communications* **10**, 339 (2019).
- 4 98. Onnink, A.M.H. *et al.* Deviant white matter structure in adults with  
5 attention-deficit/hyperactivity disorder points to aberrant myelination and  
6 affects neuropsychological performance. *Progress in Neuro-Psychopharmacology  
7 and Biological Psychiatry* **63**, 14-22 (2015).
- 8 99. Wen, Q. *et al.* White matter alterations in early-stage Alzheimer's disease: A  
9 tract-specific study. *Alzheimer's & Dementia: Diagnosis, Assessment & Disease  
10 Monitoring* **11**, 576-587 (2019).
- 11 100. Minn, Y., Suk, S. & Do, S. Osteoporosis as an independent risk factor for silent  
12 brain infarction and white matter changes in men and women: the PRESENT  
13 project. *Osteoporosis International* **25**, 2465-2469 (2014).
- 14 101. Hannawi, Y. *et al.* Hypertension is associated with white matter disruption in  
15 apparently healthy middle-aged individuals. *American Journal of Neuroradiology*  
16 **39**, 2243-2248 (2018).
- 17 102. Tan, X. *et al.* Micro-structural white matter abnormalities in type 2 diabetic  
18 patients: a DTI study using TBSS analysis. *Neuroradiology* **58**, 1209-1216 (2016).
- 19 103. Dodd, J.W. *et al.* Brain structure and function in chronic obstructive pulmonary  
20 disease: a multimodal cranial magnetic resonance imaging study. *American  
21 journal of respiratory and critical care medicine* **186**, 240-245 (2012).
- 22 104. Berry, C. *et al.* Small-vessel disease in the heart and brain: current knowledge,  
23 unmet therapeutic need, and future directions. *Journal of the American Heart  
24 Association* **8**, e011104 (2019).
- 25 105. Xu, J., Li, Y., Lin, H., Sinha, R. & Potenza, M.N. Body mass index correlates  
26 negatively with white matter integrity in the fornix and corpus callosum: a  
27 diffusion tensor imaging study. *Human brain mapping* **34**, 1044-1052 (2013).
- 28 106. Seok, J.-H. *et al.* White matter abnormalities associated with auditory  
29 hallucinations in schizophrenia: a combined study of voxel-based analyses of  
30 diffusion tensor imaging and structural magnetic resonance imaging. *Psychiatry  
31 Research: Neuroimaging* **156**, 93-104 (2007).

- 1 107. O'Connor, L.J. & Price, A.L. Distinguishing genetic correlation from causation  
2 across 52 diseases and complex traits. *Nature genetics* **50**, 1728-1734 (2018).
- 3 108. Cortes, A., Albers, P.K., Dendrou, C.A., Fugger, L. & McVean, G. Identifying  
4 cross-disease components of genetic risk across hospital data in the UK Biobank.  
5 *Nature Genetics* **52**, 126-134 (2020).
- 6 109. de Leeuw, C.A., Mooij, J.M., Heskes, T. & Posthuma, D. MAGMA: generalized  
7 gene-set analysis of GWAS data. *PLoS Computational Biology* **11**, e1004219  
8 (2015).
- 9 110. Hofer, E. *et al.* White matter lesion progression: genome-wide search for genetic  
10 influences. *Stroke* **46**, 3048-3057 (2015).
- 11 111. Sprooten, E. *et al.* White matter integrity as an intermediate phenotype:  
12 exploratory genome-wide association analysis in individuals at high risk of  
13 bipolar disorder. *Psychiatry Research* **206**, 223-231 (2013).
- 14 112. Hoffmann, T.J. *et al.* Genome-wide association analyses using electronic health  
15 records identify new loci influencing blood pressure variation. *Nature genetics*  
16 **49**, 54 (2017).
- 17 113. Hill, W.D. *et al.* Genetic contributions to two special factors of neuroticism are  
18 associated with affluence, higher intelligence, better health, and longer life.  
19 *Molecular psychiatry*, 1-19 (2019).
- 20 114. Sey, N.Y. *et al.* A computational tool (H-MAGMA) for improved prediction of  
21 brain-disorder risk genes by incorporating brain chromatin interaction profiles.  
22 (Nature Publishing Group, 2020).
- 23 115. Kelly, S. *et al.* Widespread white matter microstructural differences in  
24 schizophrenia across 4322 individuals: results from the ENIGMA Schizophrenia  
25 DTI Working Group. *Molecular psychiatry* **23**, 1261 (2018).
- 26 116. Stämpfli, P. *et al.* Subtle white matter alterations in schizophrenia identified with  
27 a new measure of fiber density. *Scientific reports* **9**, 1-11 (2019).
- 28 117. Hamza, T.H. *et al.* Common genetic variation in the HLA region is associated with  
29 late-onset sporadic Parkinson's disease. *Nature genetics* **42**, 781 (2010).
- 30 118. Hol, E. *et al.* Neuronal expression of GFAP in patients with Alzheimer pathology  
31 and identification of novel GFAP splice forms. *Molecular psychiatry* **8**, 786-796  
32 (2003).



- 1 119. Jakkula, E. *et al.* Genome-wide association study in a high-risk isolate for multiple  
2 sclerosis reveals associated variants in STAT3 gene. *The American Journal of*  
3 *Human Genetics* **86**, 285-291 (2010).
- 4 120. Aguet, F. *et al.* The GTEx Consortium atlas of genetic regulatory effects across  
5 human tissues. *BioRxiv*, 787903 (2019).
- 6 121. Finucane, H.K. *et al.* Heritability enrichment of specifically expressed genes  
7 identifies disease-relevant tissues and cell types. *Nature Genetics* **50**, 621-629  
8 (2018).
- 9 122. Uribe-Bojanini, E., Hernandez-Quiceno, S. & Cock-Rada, A.M. Xeroderma  
10 Pigmentosum with Severe Neurological Manifestations/De Sanctis–Cacchione  
11 Syndrome and a Novel XPC Mutation. *Case reports in medicine* **2017**(2017).
- 12 123. Kraemer, K.H. *et al.* Xeroderma pigmentosum, trichothiodystrophy and Cockayne  
13 syndrome: a complex genotype–phenotype relationship. *Neuroscience* **145**,  
14 1388-1396 (2007).
- 15 124. Anttinen, A. *et al.* Neurological symptoms and natural course of xeroderma  
16 pigmentosum. *Brain* **131**, 1979-1989 (2008).
- 17 125. Kassubek, J. *et al.* The cerebro-morphological fingerprint of a progeroid  
18 syndrome: white matter changes correlate with neurological symptoms in  
19 xeroderma pigmentosum. *PloS one* **7**(2012).
- 20 126. Harreld, J., Smith, E., Prose, N., Puri, P. & Barboriak, D. Trichothiodystrophy with  
21 dysmyelination and central osteosclerosis. *American journal of neuroradiology*  
22 **31**, 129-130 (2010).
- 23 127. Menning, S. *et al.* Changes in brain white matter integrity after systemic  
24 treatment for breast cancer: a prospective longitudinal study. *Brain imaging and*  
25 *behavior* **12**, 324-334 (2018).
- 26 128. Deprez, S., Billiet, T., Sunaert, S. & Leemans, A. Diffusion tensor MRI of  
27 chemotherapy-induced cognitive impairment in non-CNS cancer patients: a  
28 review. *Brain imaging and behavior* **7**, 409-435 (2013).
- 29 129. Hamanaka, G., Ohtomo, R., Takase, H., Lok, J. & Arai, K. White-matter repair:  
30 Interaction between oligodendrocytes and the neurovascular unit. *Brain*  
31 *circulation* **4**, 118 (2018).

- 1 130. Blalock, E.M. *et al.* Incipient Alzheimer's disease: microarray correlation analyses  
2 reveal major transcriptional and tumor suppressor responses. *Proceedings of the*  
3 *National Academy of Sciences* **101**, 2173-2178 (2004).
- 4 131. Koini, M., Rombouts, S., Veer, I., Van Buchem, M. & Huijbregts, S. White matter  
5 microstructure of patients with neurofibromatosis type 1 and its relation to  
6 inhibitory control. *Brain imaging and behavior* **11**, 1731-1740 (2017).
- 7 132. Kang, M. & Lee, Y.-S. The impact of RASopathy-associated mutations on CNS  
8 development in mice and humans. *Molecular brain* **12**, 1-17 (2019).
- 9 133. Shikanai, M., Yuzaki, M. & Kawauchi, T. Rab family small GTPases-mediated  
10 regulation of intracellular logistics in neural development. *Histology and*  
11 *Histopathology* **33**, 765-771 (2017).
- 12 134. Qu, L. *et al.* The Ras Superfamily of Small GTPases in Non-neoplastic Cerebral  
13 Diseases. *Frontiers in Molecular Neuroscience* **12**, 121 (2019).
- 14 135. Govek, E.-E., Newey, S.E. & Van Aelst, L. The role of the Rho GTPases in neuronal  
15 development. *Genes & development* **19**, 1-49 (2005).
- 16 136. Pers, T.H. *et al.* Biological interpretation of genome-wide association studies  
17 using predicted gene functions. *Nature Communications* **6**, 5890 (2015).
- 18 137. Smith, S.M. & Nichols, T.E. Statistical challenges in “big data” human  
19 neuroimaging. *Neuron* **97**, 263-268 (2018).
- 20 138. Martin, A.R. *et al.* Clinical use of current polygenic risk scores may exacerbate  
21 health disparities. *Nature genetics* **51**, 584 (2019).
- 22 139. Duncan, L. *et al.* Analysis of polygenic risk score usage and performance in  
23 diverse human populations. *Nature communications* **10**, 1-9 (2019).
- 24 140. Xu, Q. *et al.* CHIMGEN: a Chinese imaging genetics cohort to enhance  
25 cross-ethnic and cross-geographic brain research. *Molecular Psychiatry*, 1-13  
26 (2019).
- 27 141. Purcell, S. *et al.* PLINK: a tool set for whole-genome association and  
28 population-based linkage analyses. *The American Journal of Human Genetics* **81**,  
29 559-575 (2007).
- 30 142. Willer, C.J., Li, Y. & Abecasis, G.R. METAL: fast and efficient meta-analysis of  
31 genomewide association scans. *Bioinformatics* **26**, 2190-2191 (2010).

- 1 143. Consortium, I.H. Integrating common and rare genetic variation in diverse  
2 human populations. *Nature* **467**, 52-58 (2010).
- 3 144. Wang, D. *et al.* Comprehensive functional genomic resource and integrative  
4 model for the human brain. *Science* **362**, eaat8464 (2018).
- 5 145. Won, H. *et al.* Chromosome conformation elucidates regulatory relationships in  
6 developing human brain. *Nature* **538**, 523-527 (2016).
- 7 146. Roadmap Epigenomics, C. *et al.* Integrative analysis of 111 reference human  
8 epigenomes. *Nature* **518**, 317-330 (2015).
- 9 147. Consortium, E.P. An integrated encyclopedia of DNA elements in the human  
10 genome. *Nature* **489**, 57-74 (2012).
- 11 148. Liberzon, A. *et al.* Molecular signatures database (MSigDB) 3.0. *Bioinformatics*  
12 **27**, 1739-1740 (2011).

13

## 14 **METHODS**

15

16 **GWAS design and Imaging phenotypes.** We performed the following GWAS separately:  
17 1) the UKB British discovery GWAS, which used data of individuals of British ancestry<sup>51</sup>  
18 from the UKB study ( $n = 33,292$ ); 2) five validation GWAS performed on individuals of  
19 European ancestry, including UKB White but Non-British (UKBW,  $n = 1,809$ ), ABCD  
20 European (ABCDE,  $n = 3,821$ ), HCP ( $n = 334$ ), PING ( $n = 461$ ), and PNC ( $n = 537$ ); 3) two  
21 non-European validation GWAS, including ABCD Hispanic (ABCDH,  $n = 768$ ) and ABCD  
22 African American (ABCDA,  $n = 1,257$ ); and 4) a UKB British GWAS with subjects not  
23 present in previous GWAS<sup>24</sup> (also removed the relatives of previous GWAS subjects,  $n =$   
24  $15,214$ ). See **Supplementary Table 38** for a summary of these GWAS and demographic  
25 information of study cohorts. The raw dMRI, covariates and genetic data were  
26 downloaded from each data resource. We processed the dMRI data locally using  
27 consistent procedures via ENIGMA-DTI pipeline<sup>36,37</sup> to generate 215 mean and PC DTI  
28 phenotypes for 21 predefined white matter tracts (**Supplementary Table 39**). A full  
29 description of image acquisition and preprocessing, quality controls, ENIGMA-DTI  
30 pipeline, white matter tracts, principle component extraction, and formulas of DTI  
31 parameters are detailed in **Supplementary Note**. An overview of imaging procedures is  
32 shown in **Supplementary Figs. 16-17** and a few image examples are given in

1 **Supplementary Figs. 18-21.** For each continuous phenotype or covariate variable, we  
2 removed values greater than five times the median absolute deviation from the median  
3 value.

4  
5 **Association discovery and validation.** Genotyping and quality controls are documented  
6 in **Supplementary Note**. We estimated the SNP heritability by all autosomal SNPs in UKB  
7 British discovery GWAS data using GCTA-GREML analysis<sup>40</sup>. The adjusted covariates  
8 included age (at imaging), age-squared, sex, age-sex interaction, age-squared-sex  
9 interaction, imaging site, as well as the top 40 genetic principle components (PCs)  
10 provided by UKB<sup>51</sup> (Data-Field 22009). The heritability estimates were tested in  
11 one-sided likelihood ratio tests. We performed linear mixed model-based association  
12 analysis using fastGWA<sup>41</sup>. The same set of covariates as in GCTA-GREML analysis were  
13 adjusted. To replicate previous findings, we also performed another UKB British GWAS  
14 with subjects not present in previous GWAS<sup>24</sup>. In addition, GWAS were separately  
15 performed on UKBW, ABCDE, HCP, PING, PNC, ABCDA, and ABCDH datasets using  
16 Plink<sup>141</sup>. In the seven validation GWAS, we adjusted for age, age-squared, sex, age-sex  
17 interaction, age-squared-sex interaction, and top ten genetic PCs estimated from  
18 genetic variants. We also adjusted for imaging sites in ABCD GWAS (ABCDA, ABCDH, and  
19 ABCDE).

20  
21 We applied a few analyses to support the findings in UKB British discovery GWAS. First,  
22 the LDSC<sup>47</sup> software (version 1.0.0) was then used to estimate the pairwise genetic  
23 correlation between DTI parameter values in discovery GWAS and the meta-analyzed  
24 five European validation GWAS ( $n = 6,962$ ). The meta-analysis was performed using  
25 METAL<sup>142</sup> with the sample-size weighted approach. We used the pre-calculated LD  
26 scores provided by LDSC, which were computed using 1000 Genomes European data.  
27 We used HapMap3<sup>143</sup> variants and removed all variants in the major histocompatibility  
28 complex (MHC) region. In addition, we also performed another meta-analysis for the  
29 UKB British discovery GWAS and the five European validation GWAS to check whether  
30 the  $P$ -values became smaller after combining these results. Next, polygenic risk scores  
31 (PRS) were created on the seven validation datasets using the BLUP effect sizes  
32 estimated from GCTA-GREML analysis of UKB British discovery GWAS. We used PLINK to

1 generate risk scores in each testing data by summarizing across genome-wide variants,  
2 weighed by their BLUP effect sizes. We tried 17  $P$ -value thresholds for variant selection  
3 using their marginal  $P$ -values from fastGWAS: 1, 0.8, 0.5, 0.4, 0.3, 0.2, 0.1, 0.08, 0.05,  
4 0.02, 0.01,  $1 \times 10^{-3}$ ,  $1 \times 10^{-4}$ ,  $1 \times 10^{-5}$ ,  $1 \times 10^{-6}$ ,  $1 \times 10^{-7}$ , and  $1 \times 10^{-8}$ . Then, we generated  
5 17 polygenic profiles for each phenotype and reported the best prediction power that  
6 can be achieved by a single profile. The association between polygenic profile and  
7 phenotype was estimated and tested in linear models, adjusting for the effects of  
8 covariates used in the corresponding validation GWAS. The additional phenotypic  
9 variation that can be explained by polygenic profile (i.e., the incremental R-squared) was  
10 used to measure the prediction accuracy.

11

12 **Genomic risk loci characterization and comparison with previous findings.** We defined  
13 genomic risk loci by using FUMA (version 1.3.5e). We input the UKB British discovery  
14 GWAS summary statistics after reweighting the  $P$ -values using functional information via  
15 FINDOR<sup>52</sup>. Specifically, FUMA first identified independent significant variants, which  
16 were variants with a  $P$ -value smaller than the predefined threshold and independent of  
17 other significant variants (LD  $r^2 < 0.6$ ). FUMA constructed LD blocks for these  
18 independent significant variants by tagging all variants in LD ( $r^2 \geq 0.6$ ) with at least one  
19 independent significant variant and had a MAF  $\geq 0.0005$ . These variants included those  
20 from the 1000 Genomes reference panel that may not have been included in the GWAS.  
21 Based on these independent significant variants, lead variants were identified as those  
22 that were independent from each other (LD  $r^2 < 0.1$ ). If LD blocks of independent  
23 significant variants were closed (<250 kb based on the closest boundary variants of LD  
24 blocks), they were merged to a single genomic locus. Thus, each genomic risk locus  
25 could contain more than one independent significant variants and lead variants. We  
26 performed functionally-informed fine-mapping by using SuSiE<sup>44</sup> method via PolyFun<sup>45</sup>  
27 framework for risk loci. The summary statistics from UKB British discovery GWAS were  
28 used as input. As suggested, we estimated the LD matrix using our training GWAS  
29 individuals. To validate previous findings reported in Zhao, et al. <sup>24</sup>, we estimated the  
30 pairwise genetic correlation between DTI parameter values in previous GWAS and the  
31 UKB British GWAS with subjects not included in previous GWAS. We also estimated the  
32 replication slope<sup>52</sup> between two groups of standardized effect sizes. We focused on

1 previously reported top ( $P < 1 \times 10^{-6}$ ) independent SNPs after LD-based clumping  
2 (window size 250, LD  $r^2 = 0.01$ ). Independent significant variants and all their tagged  
3 variants were searched by FUMA in the NHGRI-EBI GWAS catalog (version 2019-09-24)  
4 to look for previously reported associations ( $P < 9 \times 10^{-6}$ ) with any traits. In our UKB  
5 British discovery GWAS data, we performed voxel-wise association analysis to illustrate  
6 spatial maps for several selected pleiotropic variants. The same set of covariates used in  
7 the above tract-based GWAS analysis were adjusted in this voxel-wise analysis.

8

9 **Genetic correlation estimation and validation.** We used LDSC to estimate the pairwise  
10 genetic correlation between DTI parameters and other complex traits. The summary  
11 statistics of DTI parameters were from the UKB British discovery GWAS and the  
12 summary statistics of other traits were collected from publicly accessible data resources  
13 listed in **Supplementary Table 18**. To replicate the significant associations, we reran  
14 LDSC using the meta-analyzed summary statistics from the five European validation  
15 GWAS. In addition, we also constructed PRS for other complex traits on each of the five  
16 validation datasets and tested whether the PRS had significant association with DTI  
17 parameters. We used the LD-based pruning (window size 50, step 5, LD  $r^2 = 0.2$ )  
18 procedure to account for the LD structure in this cross-trait PRS analysis. We also  
19 applied the 17 GWAS  $P$ -value thresholds for variants selection and reported the smallest  
20  $P$ -value observed in validation data. We applied the LCV<sup>107</sup> (version 2019-03-14) to  
21 explore the genetical causal relationships between DTI parameters and other complex  
22 traits. We used the summary statistics from the UKB British discovery GWAS and the  
23 pre-calculated LD scores provided by LDSC.

24

25 **Gene-level analysis.** We first performed gene-based association analysis in UKB British  
26 discovery GWAS for 18,796 protein-coding genes using MAGMA<sup>109</sup> (version 1.07).  
27 Default MAGMA settings were used with zero window size around each gene. We then  
28 carried out FUMA functional annotation and mapping analysis, in which variants were  
29 annotated with their biological functionality and then were linked to 35,808 candidate  
30 genes by a combination of positional, eQTL, and 3D chromatin interaction mappings. We  
31 chose brain-related tissues/cells in all options and used default values for all other  
32 parameters. For the detected genes in MAGMA and FUMA, we performed lookups in

1 the NHGRI-EBI GWAS catalog (version 2020-02-08) again to explore their previously  
2 reported associations. We also applied H-MAGMA<sup>114</sup> (version 2019-11-29) to perform  
3 Hi-C coupled gene-based association analysis by integrating Hi-C profiles from fetal and  
4 adult brain tissues<sup>144,145</sup>.

5  
6 **Biological annotations.** We performed gene property analysis for the 13 GTEx<sup>120</sup> v8  
7 brain tissues via MAGMA. Specifically, we tested whether the tissue-specific gene  
8 expression levels can be linked to the strength of the gene-trait association. We also  
9 performed heritability enrichment analysis via stratified LDSC<sup>121</sup> for  
10 cell-type/tissue-specific annotations of DNase I hypersensitivity and activating  
11 histone<sup>146,147</sup>. MAGMA and DEPICT (version 1 rel194) were separately used to explore  
12 the implicated biological pathways. MAGMA gene-set analysis examined 5,500 curated  
13 gene sets and 9,996 Gene Ontology (GO) terms from the Molecular Signatures  
14 Database<sup>148</sup> (MSigDB, version 7.0) and DEPICT tested 10,968 pre-constructed gene sets  
15 using GWAS summary statistics with  $P$ -value  $< 10^{-5}$  as input. All other parameters were  
16 set as default.

#### 17 18 **Data availability**

19 Our GWAS summary statistics have been shared at <https://github.com/BIG-S2/GWAS>.  
20 The individual-level raw data used in this study can be obtained from five publicly  
21 accessible data resources: UK Biobank (<http://www.ukbiobank.ac.uk/resources/>), ABCD  
22 (<https://abcdstudy.org/>), PING (<https://www.chd.ucsd.edu/research/ping-study.html>),  
23 PNC (<https://www.med.upenn.edu/bbl/philadelphianeurodevelopmentalcohort.html>),  
24 and HCP (<https://www.humanconnectome.org/>).

#### 25 26 **Code availability**

27 We made use of publicly available software and tools listed in URLs. All codes used to  
28 generate our results are available upon reasonable request.

#### 29 30 **Figure legends**

31



1 **Figure 1. SNP heritability estimates of 215 DTI parameters (n=33,292 subjects) and**  
2 **illustration of the top five FA principal components (PCs) of external capsule (EC).**

3 a) The SNP heritability was estimated as the proportion of variation explained by all  
4 autosomal genetic variants using GCTA-GREML analysis<sup>40</sup> after adjusting the effects of  
5 age (at imaging), age-squared, sex, age-sex interaction, age-squared-sex interaction, as  
6 well as the top 40 genetic principle components (PCs). The 110 mean DTI parameters  
7 and 105 FA PC DTI parameters (n=33,292 subjects) are displayed on the left and right  
8 panels, respectively. The x-axis lists the names of white matter tracts. b) The functional  
9 principal component (PC) coefficients for the top five FA PCs of EC.

10

11 **Figure 2. Annotation of white matter tracts and the number of independent significant**  
12 **variants identified in UKB British discovery GWAS at  $2.3 \times 10^{-10}$  significance level**  
13 **(n=33,292 subjects).**

14 a) Annotation of the 21 white matter tracts in human brain; b) The first three columns  
15 are the number of independent significant variants identified in each white matter tract  
16 by 1) any DTI parameters; 2) any FA parameters; 3) FA PC parameters, respectively. The  
17 fourth column in b) displays the proportion of FA-associated variants that can only be  
18 identified by PC parameters. We performed linear mixed model-based association  
19 analysis using fastGWA<sup>41</sup>.

20

21 **Figure 3. Number of previously reported GWAS variants for other complex traits that**  
22 **are associated with white matter tracts and the spatial map of voxel-wise effect size**  
23 **patterns for four selected pleiotropic variants (n=33,292 subjects).**

24 The y-axis lists the 21 white matter tracts. The x-axis provides the name of different trait  
25 domains. The displayed numbers are the number of pleiotropic variants that have been  
26 linked to other traits. Details of these overlaps can be found in **Supplementary Table 16**.

27

28 **Figure 4. Significant pairwise genetic correlations between white matter tracts and**  
29 **other complex traits (n=33,292 subjects).**

30 The pairwise genetic correlations were estimated and tested by LDSC<sup>47</sup>. We adjusted for  
31 multiple testing by the Benjamini-Hochberg procedure at 0.05 significance level (215 ×  
32 76 tests). The y-axis lists the 21 white matter tracts. The x-axis provides the name of

1 other traits, whose sample size and detailed information can be found in  
2 **Supplementary Table 18**. The pairs were divided into three groups and labeled with  
3 three different colors: “Mean only” (orange) represent pairs solely identified by mean  
4 DTI parameters; “PC only” (red) are pairs uniquely detected by FA PC DTI parameters;  
5 and “Both” (blue) correspond to pairs that can be found by both mean and PC  
6 parameters.

7

8 **Figure 5. Number of overlapped genes between 57 complex traits and 21 white matter**  
9 **tracts in gene-based association analysis (n=33,292 subjects).**

10 The y-axis lists the 21 white matter tracts. The x-axis provides the name of other traits,  
11 whose sample size and detailed information can be found in **Supplementary Table 18**.  
12 The displayed numbers are the number of overlapped genes between each tract-trait  
13 pair in gene-based association analysis. For DTI parameters and brain-related complex  
14 traits, the association analysis was performed using Hi-C coupled MAGMA analysis; and  
15 we performed traditional MAGMA analysis for non-brain traits.

16

a)

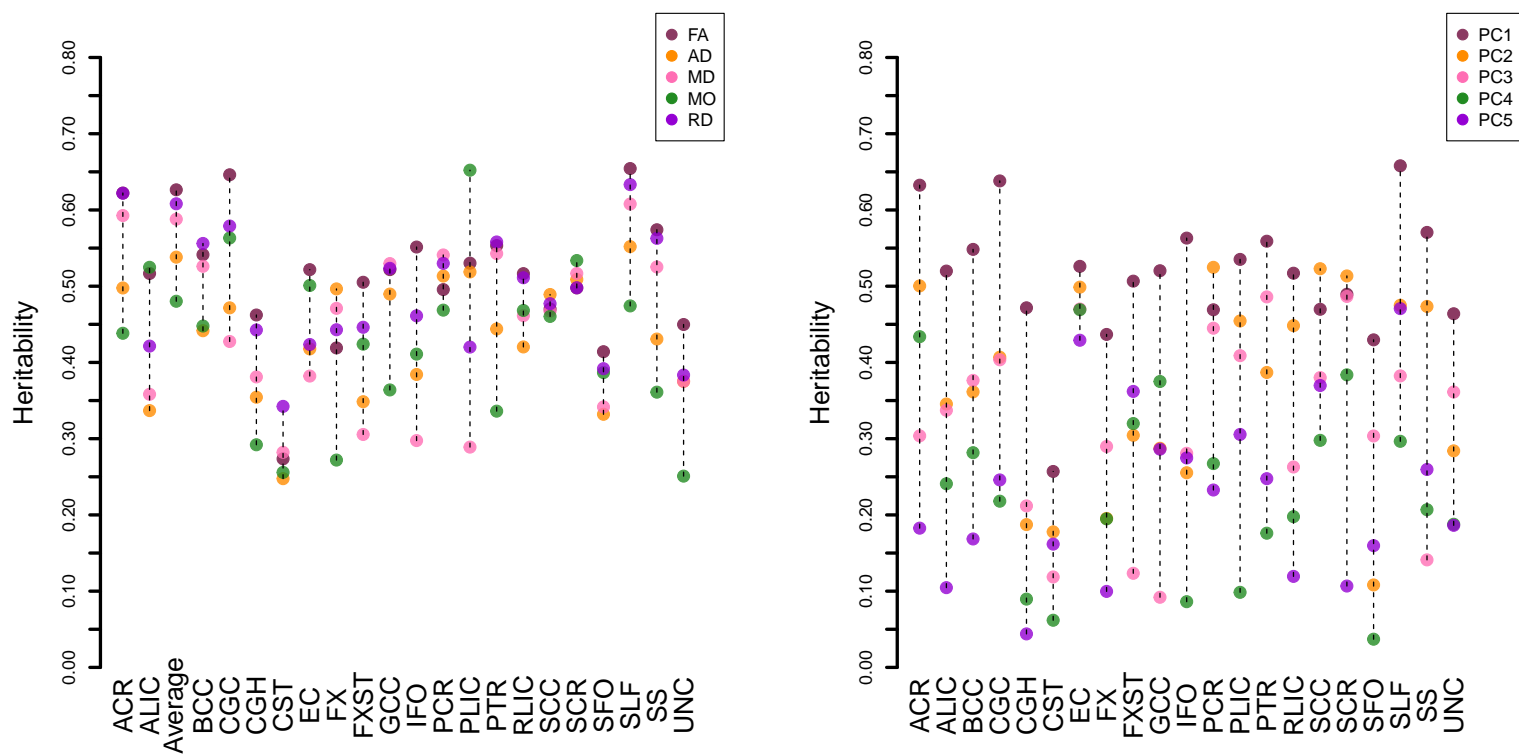

b)

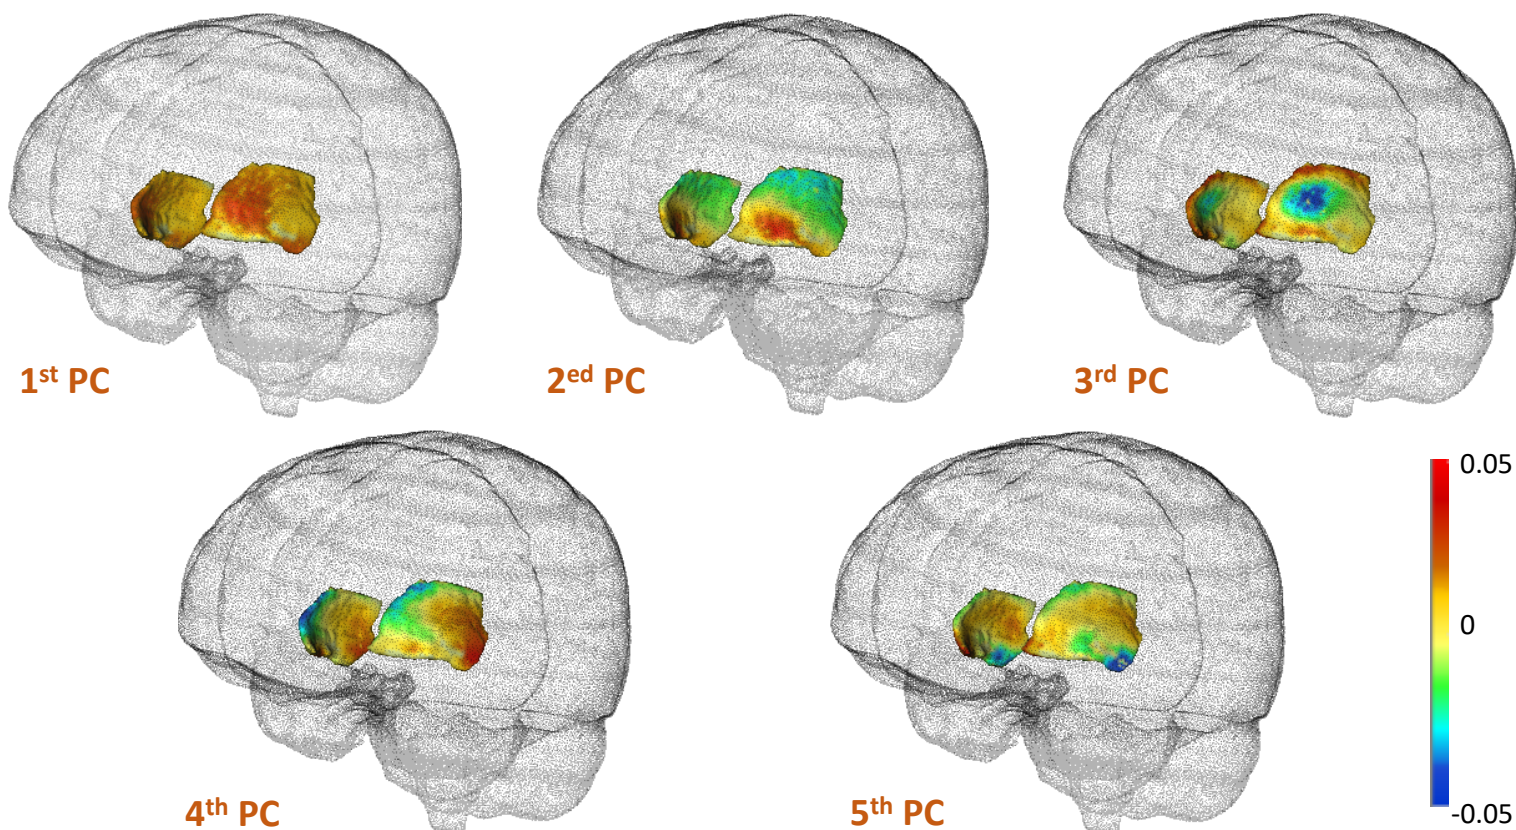

Figure 1



a)

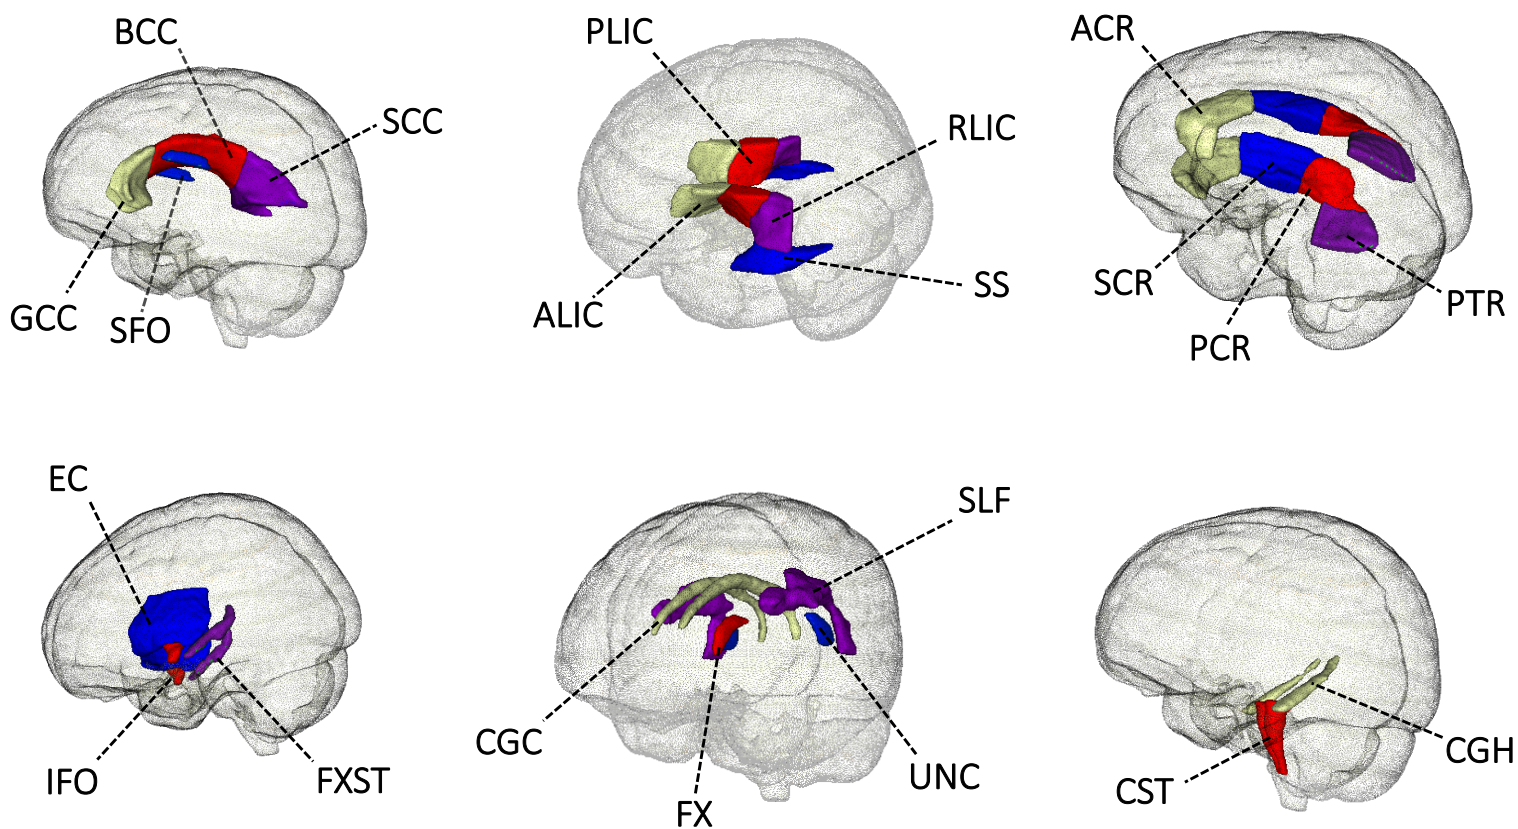

b)

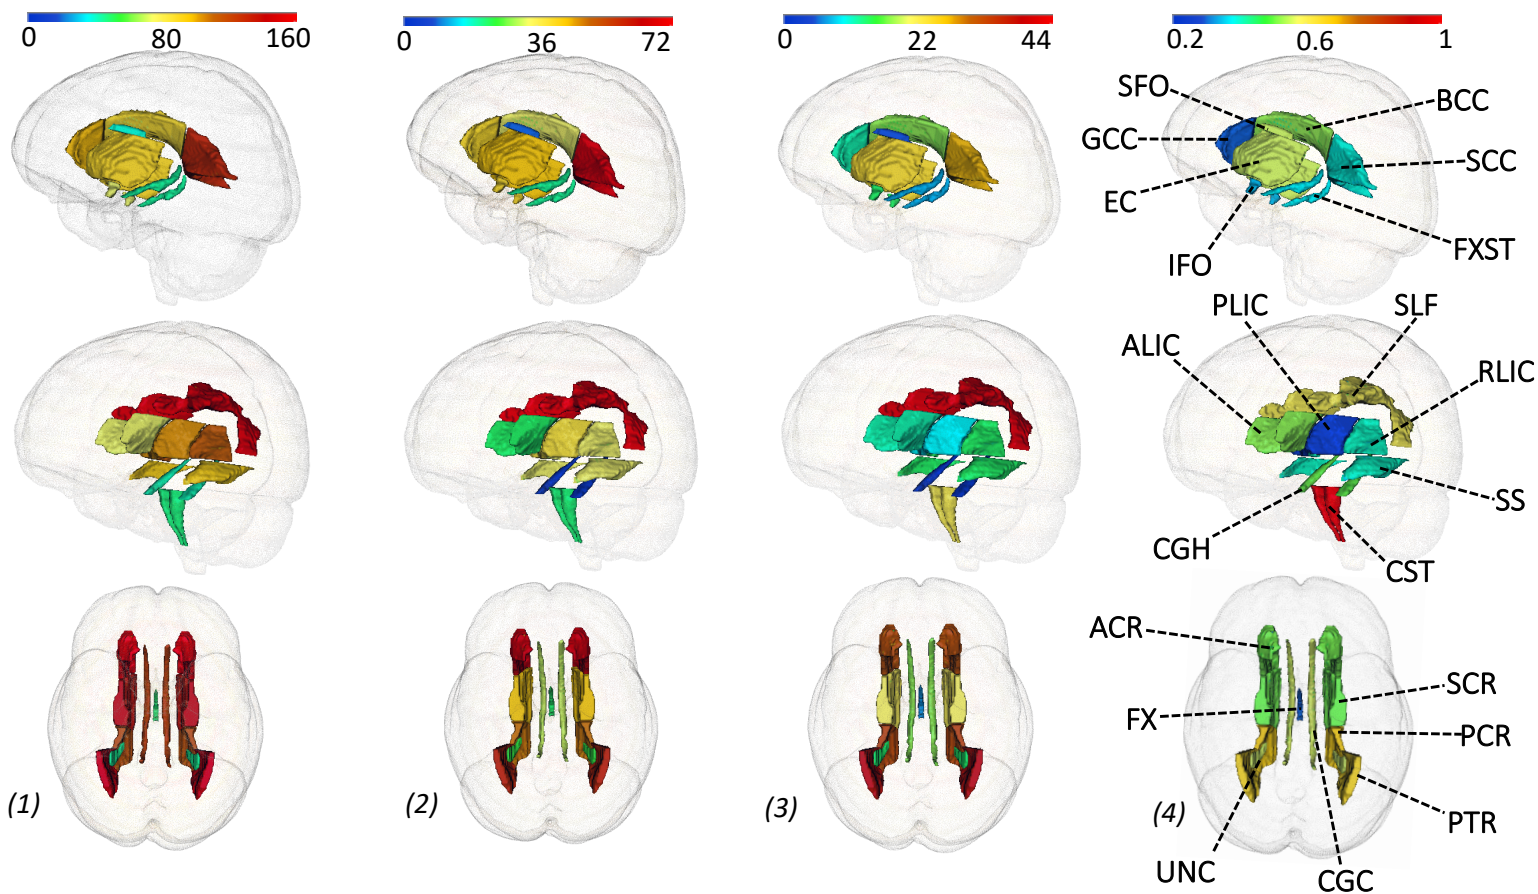

Figure 2

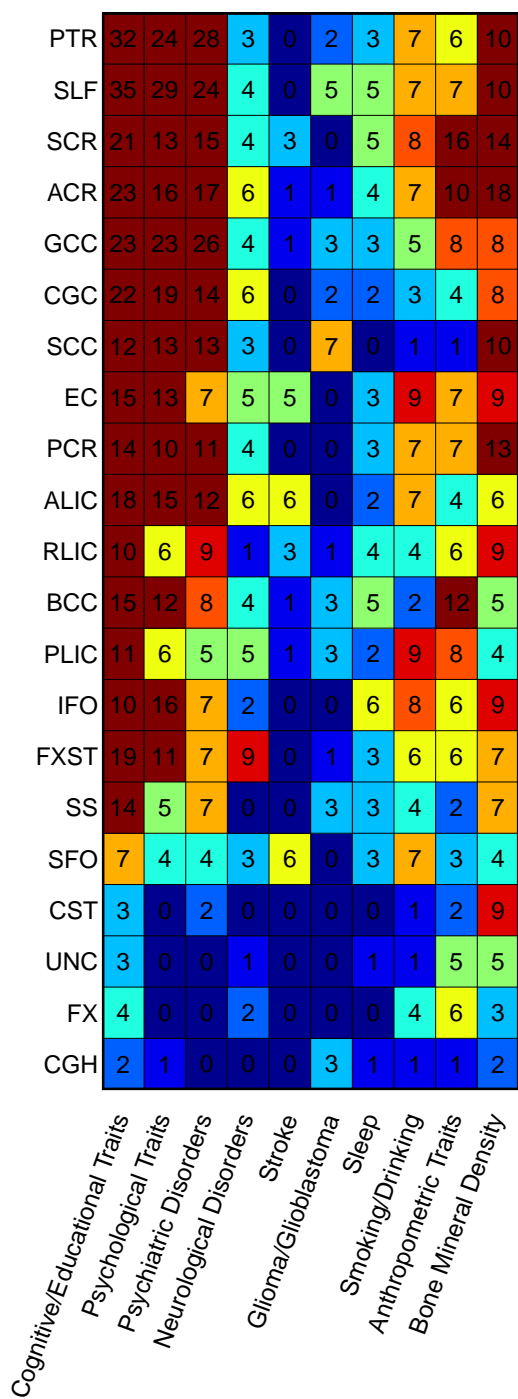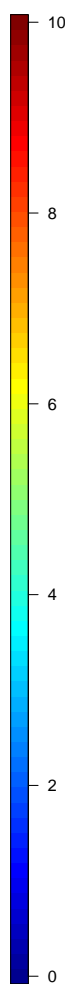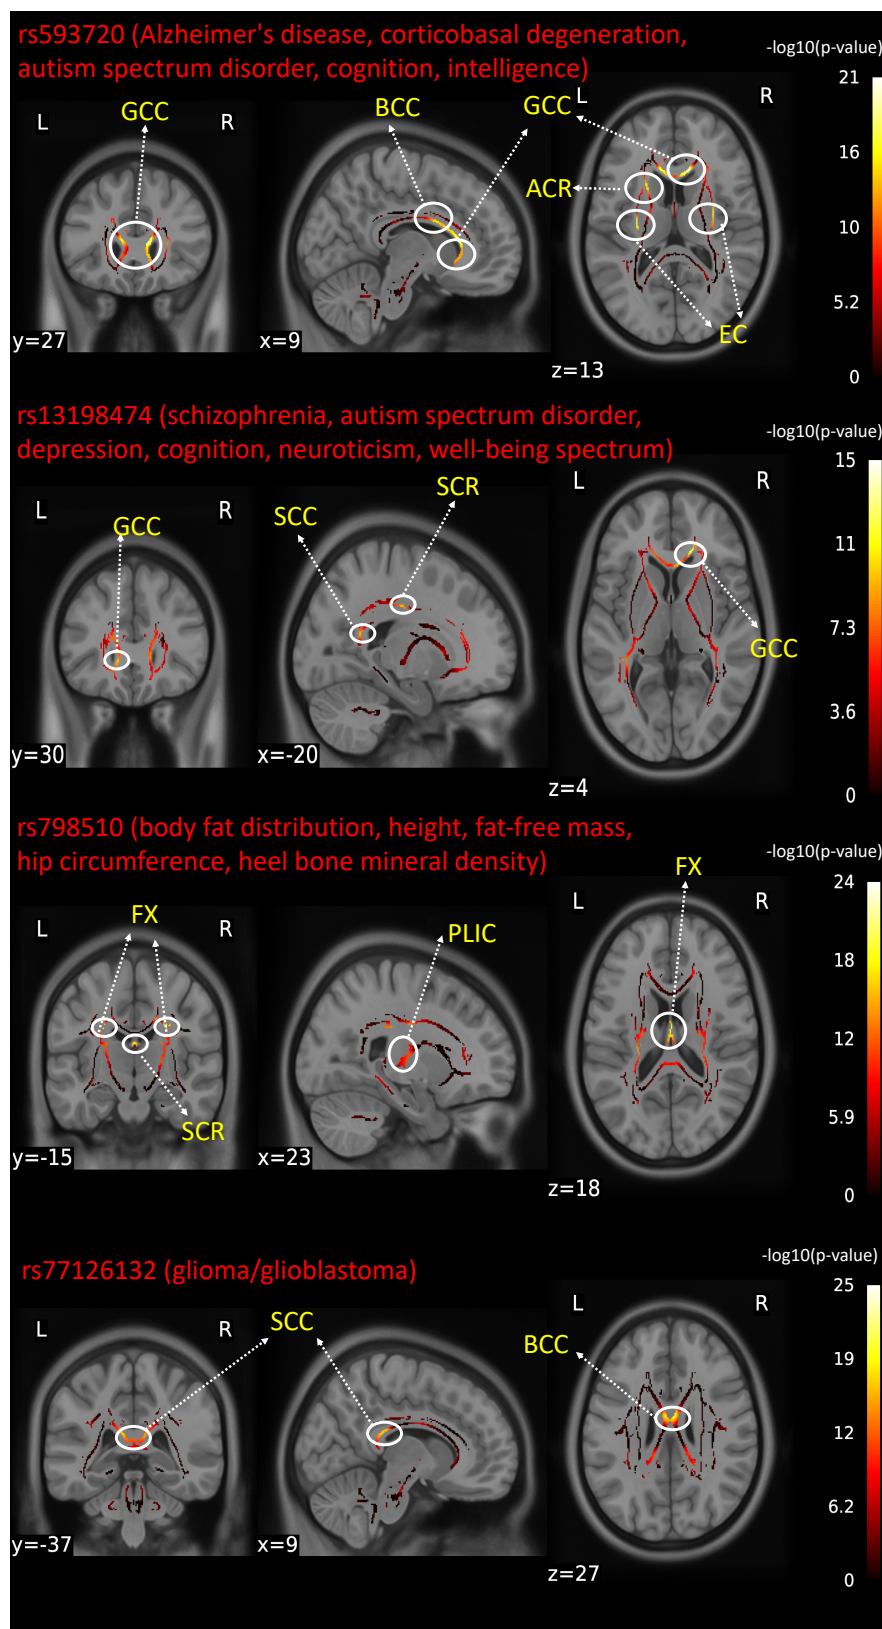

Figure 3

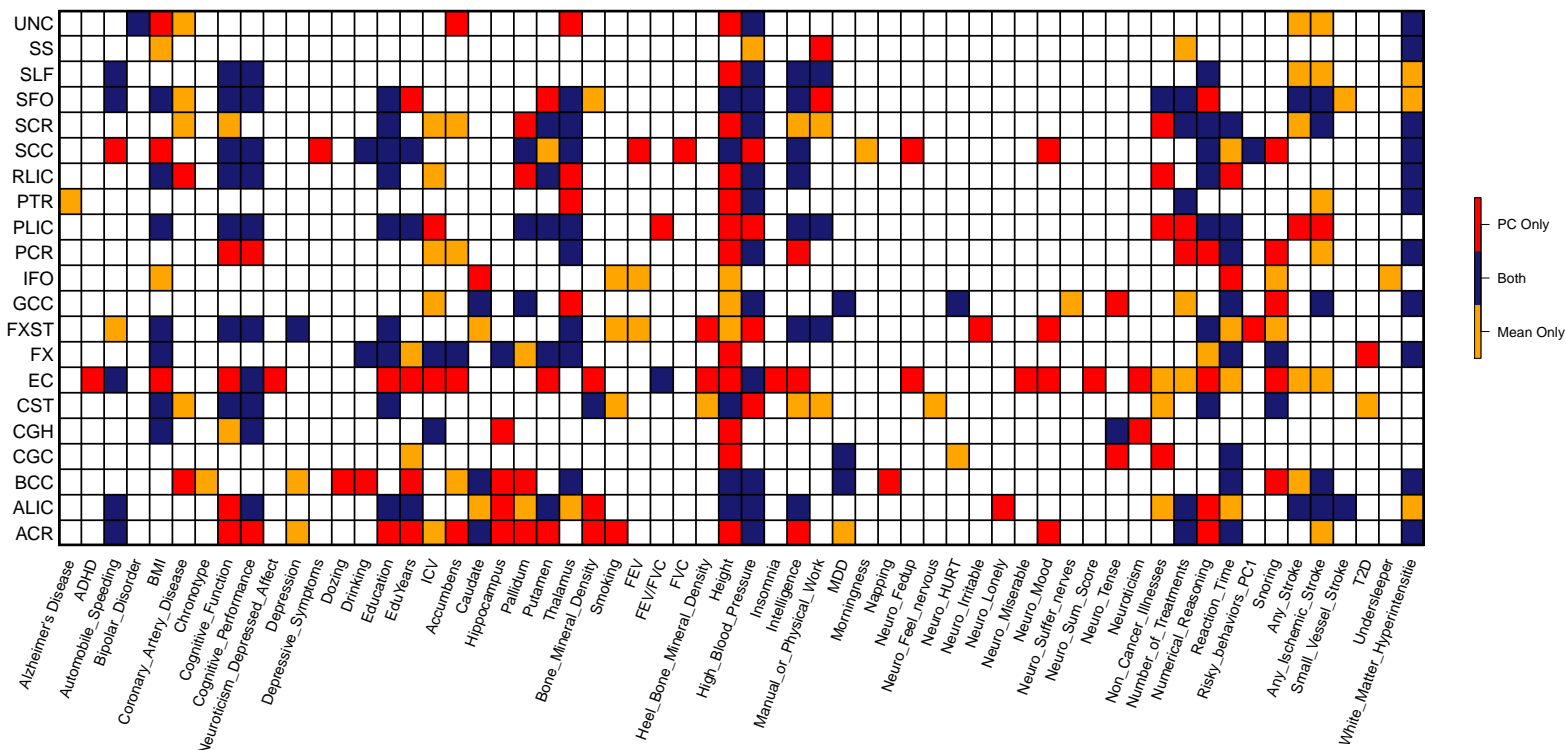

Figure 4
